# Supplementary material for: Experimental evidence for CH⋯π interaction-mediated stabilization of the square form in phenylglycine-incorporated ascidiacyclamide
Source: Royal Society of Chemistry journal article supplement (doi:10.1039/d2ra07063d), 2023-01-01
Supplement: d2ra07063d1.pdf [file d2ra07063d1.pdf]

## Electronic supporting information for

“Experimental evidence for CH $\cdots\pi$  interaction-mediated atabilization of the square form in phenylglycine-incorporated ascidiacyclamide”

Akiko Asano\*, Katsuhiko Minoura, Takeshi Yamada, and Mitsunobu Doi

*Faculty of Pharmacy, Osaka Medical and Pharmaceutical University, 4-20-1 Nasahara, Takatsuki, Osaka 569-1094, Japan.*

### Contents:

|                                                                                                     |            |
|-----------------------------------------------------------------------------------------------------|------------|
| Synthesis and characterization of the peptides <b>Xb</b> and <b>Xc</b> (X=2-4).....                 | Page 2-7   |
| <sup>1</sup> H NMR spectra for peptides <b>Xb</b> and <b>Xc</b> (X=2-4).....                        | Page 8-25  |
| Crystallographic data for peptides <b>2b</b> and <b>2c</b> .....                                    | Page 26    |
| The CH $\cdots\pi$ contacts within the crystal structures of <b>1c</b> and <b>2c</b> .....          | Page 27-28 |
| Temperature coefficients of protons of Xaa <sup>1</sup> alkyl side chain in <b>Xc</b> peptides..... | Page 29    |
| Thermodynamic parameters and van't Hoff plots for <b>Xb</b> and <b>Xc</b> (X=2-4) peptides.....     | Page 30-35 |
| Cytotoxicities of peptides toward HL-60 cell.....                                                   | Page 36    |
| Chemical structure of <i>d</i> ASC and T3ASC as reference peptides.....                             | Page 37    |

## Synthesis and characterization of the peptides Xb and Xc (X=2-4).

### General Experimental Methods

Pure products were obtained after liquid chromatography using Merck silica gel 60 (40-63  $\mu\text{m}$ ). Analytical thin-layer chromatography was carried out on Merck silica gel F<sub>254</sub> plates with the following solvent system (v/v); chloroform : methanol : acetic acid (95 : 10 : 3). The plates were visualized with UV light ( $\lambda = 254 \text{ nm}$ ) and revealed with a 5 % solution of ninhydrin in ethanol. <sup>1</sup>H NMR spectra were recorded on an Agilent DD2 600-MHz NMR spectrometer (Agilent Technologies, California, USA). Peptide concentrations were about 5.0 mM in CD<sub>3</sub>CN. Chemical shifts were measured relative to internal trimethylsilane at 0.00 ppm. The protons were assigned using two dimensional correlated spectroscopy (2D-COSY) and rotating-frame Overhauser effect spectroscopy (ROESY; mixing time = 500 ms). Low-resolution mass spectra (LR-MS) were obtained by using matrix-assisted laser desorption ionization (MALDI-TOF) mass spectroscopy on a Bruker microflex LRF (Bruker, Massachusetts, USA).

### Synthesis of Boc-D-Val(Thz)-OMe

Boc-D-Val(Thz)-OMe was prepared according to previous report (Y. Hamada *et. al.*, *J. Org. Chem.*, 1987, **52**, 1252-1255) (Scheme S1). N-(*tert*-butoxycarbonyl)-D-valine (Boc-D-Val-OH) was first converted to the corresponding methyl ester by using methyl iodide in the presence of potassium hydrogen carbonate in N, N-dimethylformamide (DMF) at room temperature. The methyl ester was reduced with lithium chloride-sodium borohydride in tetrahydrofuran (THF) to give the amino alcohol derivative. Oxidation of the amino alcohol derivative was conveniently accomplished by the dimethyl sulfoxide (DMSO) oxidation using sulfur trioxide-pyridine complex (Py·SO<sub>3</sub>) in the presence of trimethylamine (Et<sub>3</sub>N), giving the amino aldehyde derivative. Condensation of the amino aldehyde derivative with L-cysteine methyl ester (H-L-Cys-OMe) afforded the thiazolidine derivative as a mixture of C-2 epimers. Oxidation of the thiazolidine derivative to the Boc-D-Val(Thz)-OMe was performed with activated manganese dioxide (Sigma-Aldrich Co. Llc., St. Louis, USA) in benzene.

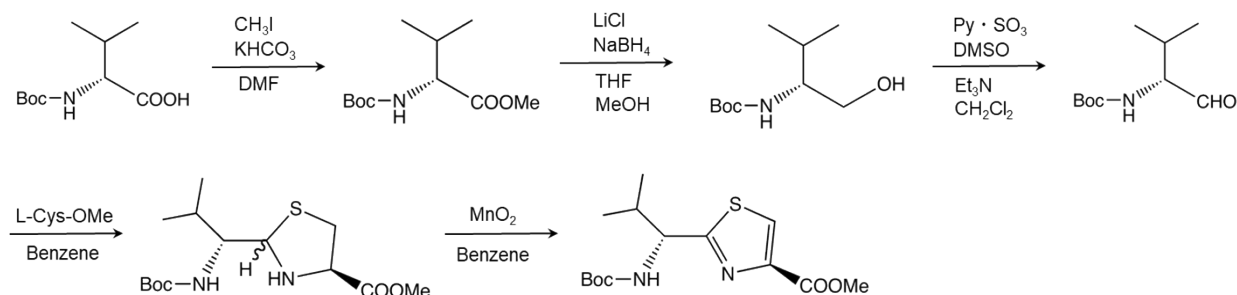

**Scheme S1**

### General procedure for the condensation

Peptides were synthesized by a conventional liquid-phase method according to Scheme S2. The linear peptide were synthesized using 1-hydroxy-benzotriazole (HOBt) (Watanabe Chemical Ind. Ltd., Hiroshima, Japan) and 1-ethyl-3-(3-dimethylaminopropyl)carbodiimide hydrochloride (EDC·HCl) (Watanabe Chemical Ind. Ltd., Hiroshima, Japan), and cyclization was conducted with benzotriazolyl-oxo-tris(pyrrolidino)-phosphonium hexafluorophosphate (PyBOP) (Watanabe Chemical Ind. Ltd., Hiroshima, Japan) in the presence of 4-dimethylaminopyridine (DMAP) (Nacalai tesque, Kyoto, Japan).

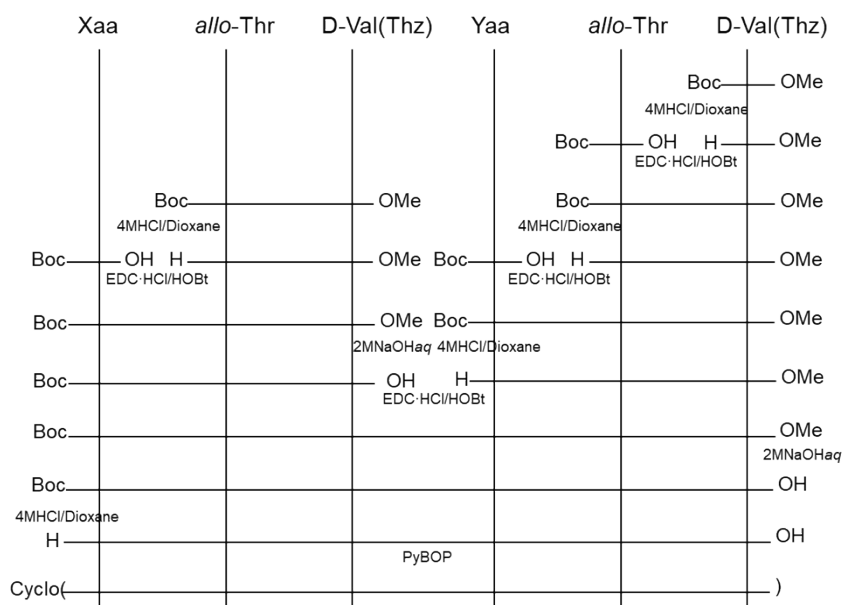

**Xb**; (Xaa,Yaa) = **2b**; (Val,Chg), **3b**; (Abu,Chg), **4b**; (Ala,Chg)

**Xc**; (Xaa,Yaa) = **2c**; (Val,Phg), **3c**; (Abu,Phg), **4c**; (Ala,Phg)

**Scheme S2**

## Synthesis of oxazoline rings

The oxazoline (Oxz) rings were formed by reacting the Ile-*allo*-Thr moiety with bis(2-methoxyethyl)aminosulfur trifluoride (Deoxo-Fluor) (Fujifilm Wako Pure Chemical, Osaka, Japan) according to previous report (A. J. Phillips *et. al.*, *Org. Lett.*, 2000, **2**, 1165-1168) (Scheme S3).

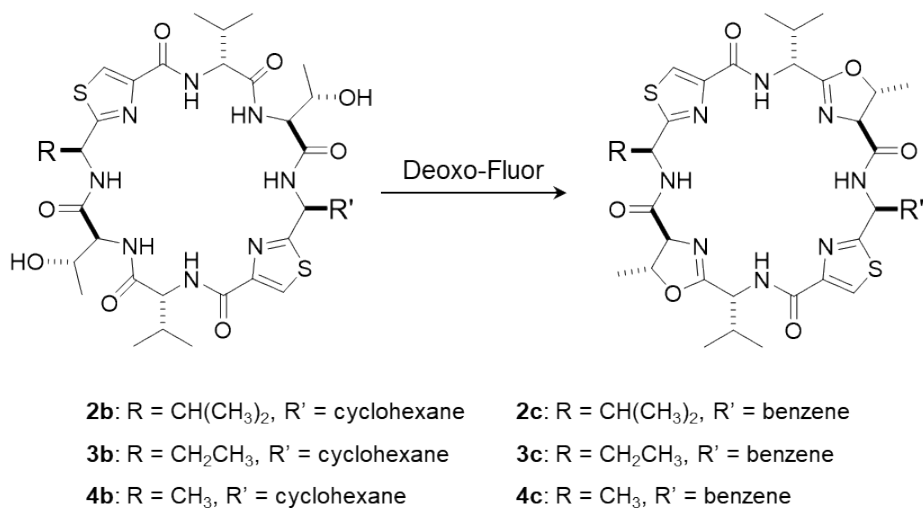

**Scheme S3**

## Characterization of peptide 2b

MALDI-TOF MS calcd for  $[C_{37}H_{52}N_8O_6S_2 + H]^+ = 769.36$ , found  $m/z$  769.41.  $^1H$  NMR (600 MHz,  $CD_3CN$ , 298 K)  $\delta = 7.89$  (d, 1H, NH Val<sup>1</sup>, J = 6.6 Hz); 7.82 (d, 1H, NH Chg<sup>5</sup>, J = 7.2 Hz); 7.76 (s, 1H, H Thz<sup>4or8</sup>); 7.75 (s, 1H, H Thz<sup>4or8</sup>); 7.21 (d, 1H, NH D-Val<sup>3or7</sup>, J = 9.6 Hz); 7.20 (d, 1H, NH D-Val<sup>3or7</sup>, J = 10.2 Hz); 5.15 (dd, 1H,  $\alpha$ H D-Val<sup>3or7</sup>, J = 10.2, 5.4 Hz); 5.14 (dd, 1H,  $\alpha$ H D-Val<sup>3or7</sup>, J = 10.2, 6.0 Hz); 4.83 (qd, 1H,  $\beta$ H OXZ<sup>2or6</sup>, J = 4.8, 6.6 Hz); 4.82 (qd, 1H,  $\beta$ H OXZ<sup>2or6</sup>, J = 4.8, 6.6 Hz); 4.60 (t, 1H,  $\alpha$ H Chg<sup>5</sup>, J = 7.2 Hz); 4.54 (t, 1H,  $\alpha$ H Val<sup>1</sup>, J = 6.6 Hz); 4.29 (dd., 1Hx2,  $\alpha$ H OXZ<sup>2,6</sup>, J = 4.8, 1.2 Hz); 2.32 (m, 1Hx2,  $\beta$ H D-Val<sup>3,7</sup>); 2.18 (oct., 1H,  $\beta$ H Val<sup>1</sup>, J = 6.6 Hz); 1.87 (m, 1H,  $\beta$ H Chg<sup>5</sup>); 1.68-0.89 (m, 10H, cyclohexyl CH<sub>2</sub> Chg<sup>5</sup>); 1.43 (d, 3H,  $\gamma$ H OXZ<sup>2or6</sup>, J = 6.6 Hz); 1.41 (d, 3H,  $\gamma$ H OXZ<sup>2or6</sup>, J = 6.6 Hz); 1.10 (d, 3Hx2,  $\gamma$ <sup>1</sup>H D-Val<sup>3,7</sup>, J = 6.6 Hz); 1.03 (d, 3Hx2,  $\gamma$ <sup>2</sup>H D-Val<sup>3,7</sup>, J = 6.6 Hz); 0.84 (d, 3Hx2,  $\gamma$ H Val<sup>1</sup>, J = 6.6 Hz).

## Characterization of peptide 3b

MALDI-TOF MS calcd for  $[C_{36}H_{50}N_8O_6S_2 + H]^+ = 755.34$ , found  $m/z$  755.37.  $^1H$  NMR (600 MHz,  $CD_3CN$ , 298 K)  $\delta = 7.88$  (d, 1H, NH Abu<sup>1</sup>, J = 6.6 Hz); 7.77 (d, 1H, NH Chg<sup>5</sup>, J = 7.8 Hz); 7.72 (s, 1H, H Thz<sup>4or8</sup>); 7.71 (s, 1H, H Thz<sup>4or8</sup>); 7.21 (d, 1H, NH D-Val<sup>3</sup>, J = 10.2 Hz); 7.16 (d, 1H, NH D-Val<sup>7</sup>, J = 10.2 Hz); 5.16 (dd, 1H,  $\alpha$ H D-Val<sup>3</sup>, J = 10.2, 6.6 Hz); 5.13 (dd, 1H,  $\alpha$ H D-Val<sup>7</sup>, J = 10.2, 6.6 Hz); 4.84 (qd, 1H,  $\beta$ H OXZ<sup>6</sup>, J = 6.0, 4.8 Hz); 4.81 (qd, 1H,  $\beta$ H OXZ<sup>2</sup>, J = 6.6, 4.2 Hz); 4.74 (q, 1H,  $\alpha$ H Abu<sup>1</sup>, J = 6.6 Hz); 4.61 (t, 1H,  $\alpha$ H Chg<sup>5</sup>, J = 7.8 Hz); 4.30 (d, 1H,  $\alpha$ H OXZ<sup>2</sup>, J = 4.2 Hz); 4.28 (d, 1H,  $\alpha$ H OXZ<sup>6</sup>, J = 4.8 Hz); 2.33 (oct., 1Hx2,  $\beta$ H D-Val<sup>3,7</sup>, J = 6.6 Hz); 1.95 (m, 1H,  $\beta$ <sup>12</sup>H Abu<sup>1</sup>); 1.82 (m, 1H,  $\beta$ <sup>13</sup>H Abu<sup>1</sup>); 1.89 (m, 1H,  $\beta$ H Chg<sup>5</sup>); 1.68-0.94 (m, 10H, cyclohexyl CH<sub>2</sub>, Chg<sup>5</sup>); 1.43 (d, 3H,  $\gamma$ H OXZ<sup>2</sup>, J = 6.6 Hz); 1.40 (d, 3H,  $\gamma$ H OXZ<sup>6</sup>, J = 6.0 Hz); 1.12 (d, 3H,  $\gamma$ <sup>1</sup>H D-Val<sup>3</sup>, J = 6.6 Hz); 1.11(d, 3H,  $\gamma$ <sup>1</sup>H D-Val<sup>7</sup>, J = 6.6 Hz); 1.04 (d, 3Hx2,  $\gamma$ <sup>2</sup>H D-Val<sup>3,7</sup>, J = 6.6 Hz); 0.73 (t, 3H,  $\gamma$ H Abu<sup>1</sup>, J = 7.8 Hz).

## Characterization of peptide 4b

MALDI-TOF MS calcd for  $[C_{35}H_{50}N_8O_6S_2 + H]^+ = 741.32$ , found  $m/z$  741.21.  $^1H$  NMR (600 MHz,  $CD_3CN$ , 298 K)  $\delta = 7.80$  (d, 1H, NH Ala<sup>1</sup>,  $J = 6.6$  Hz); 7.67 (d, 1H, NH Chg<sup>5</sup>,  $J = 8.4$  Hz); 7.63 (s, 1Hx2, H Thz<sup>4,8</sup>); 7.22 (d, 1H, NH D-Val<sup>3</sup>,  $J = 10.5$  Hz); 7.13 (d, 1H, NH D-Val<sup>7</sup>,  $J = 10.5$  Hz); 5.17 (dd, 1H,  $^{\alpha}H$  D-Val<sup>3</sup>,  $J = 10.5, 4.2$  Hz); 5.13 (dd, 1H,  $^{\alpha}H$  D-Val<sup>7</sup>,  $J = 10.5, 5.4$  Hz); 4.87 (qd, 1H,  $^{\beta}H$  Oxz<sup>6</sup>,  $J = 6.6, 4.2$  Hz); 4.83 (quint., 1H,  $^{\alpha}H$  Ala<sup>1</sup>,  $J = 6.6$  Hz); 4.79 (qd, 1H,  $^{\beta}H$  Oxz<sup>2</sup>,  $J = 6.0, 4.2$  Hz); 4.61 (t, 1H,  $^{\alpha}H$  Chg<sup>5</sup>,  $J = 8.4$  Hz); 4.30 (dd, 1H,  $^{\alpha}H$  Oxz<sup>2</sup>,  $J = 4.2, 0.6$  Hz); 4.29 (dd, 1H,  $^{\alpha}H$  Oxz<sup>6</sup>,  $J = 4.2, 0.6$  Hz); 2.34 (m, 1Hx2,  $^{\beta}H$  D-Val<sup>3,7</sup>); 1.94 (m, 1H,  $^{\beta}H$  Chg<sup>5</sup>); 1.71-1.03 (m, 10H, cyclohexyl  $CH_2$ , Chg<sup>5</sup>); 1.44 (d, 3H,  $^{\beta}H$  Ala<sup>1</sup>,  $J = 6.6$  Hz); 1.43 (d, 3H,  $^{\gamma}H$  Oxz<sup>2</sup>,  $J = 6.0$  Hz); 1.40 (d, 3H,  $^{\gamma}H$  Oxz<sup>6</sup>,  $J = 6.6$  Hz); 1.11 (d, 3H,  $^{\gamma^1}H$  D-Val<sup>3</sup>,  $J = 6.6$  Hz); 1.10 (d, 3H,  $^{\gamma^1}H$  D-Val<sup>7</sup>,  $J = 6.6$  Hz); 1.06 (d, 3Hx2,  $^{\gamma^2}H$  D-Val<sup>3,7</sup>,  $J = 6.6$  Hz).

## Characterization of peptide 2c

MALDI-TOF MS calcd for  $[C_{37}H_{46}N_8O_6S_2 + H]^+ = 763.31$ , found  $m/z$  763.37.  $^1H$  NMR (600 MHz,  $CD_3CN$ , 298 K)  $\delta = 8.58$  (d, 1H, NH Phg<sup>5</sup>,  $J = 7.8$  Hz); 8.09 (s, 1H, H Thz<sup>4or8</sup>); 8.05 (d, 1H, NH Val<sup>1</sup>,  $J = 8.4$  Hz); 7.94 (s, 1H, H Thz<sup>4or8</sup>); 7.55 (d, 1H, NH D-Val<sup>7</sup>,  $J = 10.2$  Hz); 7.26 (d, 1H, NH D-Val<sup>3</sup>,  $J = 10.2$  Hz); 7.21-7.17 (m, 3H, ArH Phg<sup>5</sup>); 7.06-7.04 (m, 2H, ArH Phg<sup>5</sup>); 5.76 (dd,  $^{\alpha}H$  Phg<sup>5</sup>,  $J = 7.8, 1.8$  Hz); 5.20 (dd, 1H,  $^{\alpha}H$  D-Val<sup>7</sup>,  $J = 10.0, 6.6$  Hz); 5.09 (dd, 1H,  $^{\alpha}H$  D-Val<sup>3</sup>,  $J = 10.2, 8.4$  Hz); 4.72 (quint., 1H,  $^{\beta}H$  Oxz<sup>2</sup>,  $J = 6.0$  Hz); 4.69 (quint., 1H,  $^{\beta}H$  Oxz<sup>6</sup>,  $J = 6.0$  Hz); 4.62 (ddd, 1H,  $^{\alpha}H$  Val<sup>1</sup>,  $J = 8.4, 3.6, 1.8$  Hz); 4.40 (dd, 1H,  $^{\alpha}H$  Oxz<sup>6</sup>,  $J = 6.0, 1.8$  Hz); 4.24 (dd, 1H,  $^{\alpha}H$  Oxz<sup>2</sup>,  $J = 6.0, 1.8$  Hz); 2.36 (m, 1H,  $^{\beta}H$  D-Val<sup>3</sup>); 2.31 (oct., 1H,  $^{\beta}H$  D-Val<sup>7</sup>,  $J = 6.6$  Hz); 1.78 (sept.d, 1H,  $^{\beta}H$  Val<sup>1</sup>,  $J = 6.6, 3.6$  Hz); 1.43 (d, 3H,  $^{\gamma}H$  Oxz<sup>6</sup>,  $J = 6.0$  Hz); 1.31 (d, 3H,  $^{\gamma}H$  Oxz<sup>2</sup>,  $J = 6.0$  Hz); 1.15 (d, 3H,  $^{\gamma^1}H$  D-Val<sup>7</sup>,  $J = 6.6$  Hz); 1.13 (d, 3H,  $^{\gamma^1}H$  D-Val<sup>3</sup>,  $J = 6.0$  Hz); 0.99 (d, 3H,  $^{\gamma^2}H$  D-Val<sup>7</sup>,  $J = 6.6$  Hz); 0.96 (d, 3H,  $^{\gamma^2}H$  D-Val<sup>3</sup>,  $J = 6.0$  Hz); 0.32 (d, 3H,  $^{\gamma^1}H$  Val<sup>1</sup>,  $J = 6.6$  Hz); 0.29 (d, 3H,  $^{\gamma^1}H$  Val<sup>1</sup>,  $J = 6.6$  Hz).

### Characterization of peptide 3c

MALDI-TOF MS calcd for  $[C_{36}H_{44}N_8O_6S_2 + H]^+ = 749.29$ , found  $m/z$  749.36.  $^1H$  NMR (600 MHz,  $CD_3CN$ , 298 K)  $\delta = 8.50$  (d, 1H, NH Phg<sup>5</sup>,  $J = 7.8$  Hz); 8.09 (d, 1H, NH Abu<sup>1</sup>,  $J = 7.8$  Hz); 8.06 (s, 1H, H Thz<sup>4or8</sup>); 7.91 (s, 1H, H Thz<sup>4or8</sup>); 7.50 (d, 1H, NH D-Val<sup>7</sup>,  $J = 9.6$  Hz); 7.25 (d, 1H, NH D-Val<sup>3</sup>,  $J = 10.2$  Hz); 7.22-7.17 (m, 3H, ArH Phg<sup>5</sup>); 7.10-7.07 (m, 2H, ArH Phg<sup>5</sup>); 5.79 (dd, 1H,  $^{\alpha}H$  Phg<sup>5</sup>,  $J = 7.8, 1.8$  Hz); 5.16 (dd, 1H,  $^{\alpha}H$  D-Val<sup>7</sup>,  $J = 9.6, 7.8$  Hz); 5.09 (dd, 1H,  $^{\alpha}H$  D-Val<sup>3</sup>,  $J = 10.2, 8.4$  Hz); 4.75 (m, 1H,  $^{\alpha}H$  Abu<sup>1</sup>); 4.70 (quint., 1H,  $^{\beta}H$  Oxz<sup>6</sup>,  $J = 6.0$  Hz); 4.68 (quint., 1H,  $^{\beta}H$  Oxz<sup>2</sup>,  $J = 6.0$  Hz); 4.39 (dd, 1H,  $^{\alpha}H$  Oxz<sup>6</sup>,  $J = 6.0, 1.8$  Hz); 4.25 (dd, 1H,  $^{\alpha}H$  Oxz<sup>2</sup>,  $J = 6.0, 1.2$  Hz); 2.36 (m, 1Hx2,  $^{\beta}H$  D-Val<sup>3,7</sup>); 1.43 (d, 3H,  $^{\gamma}H$  Oxz<sup>6</sup>,  $J = 6.0$  Hz); 1.41 (m, 1H, Abu<sup>1</sup>); 1.29 (d, 3H,  $^{\gamma}H$  Oxz<sup>2</sup>,  $J = 6.0$  Hz); 1.16 (d, 3H,  $^{\gamma^1}H$  D-Val<sup>7</sup>,  $J = 6.6$  Hz); 1.14 (d, 3H,  $^{\gamma^1}H$  D-Val<sup>3</sup>,  $J = 6.6$  Hz); 1.00 (d, 3H,  $^{\gamma^2}H$  D-Val<sup>7</sup>,  $J = 6.6$  Hz); 0.97 (d, 3H,  $^{\gamma^2}H$  D-Val<sup>3</sup>,  $J = 6.6$  Hz); -0.02 (t, 3H,  $^{\gamma}H$  Abu<sup>1</sup>,  $J = 7.2$  Hz).

### Characterization of peptide 4c

MALDI-TOF MS calcd for  $[C_{35}H_{42}N_8O_6S_2 + H]^+ = 735.28$ , found  $m/z$  735.36.  $^1H$  NMR (600 MHz,  $CD_3CN$ , 298 K)  $\delta = 8.44$  (d, 1H, NH Phg<sup>5</sup>,  $J = 8.4$  Hz); 7.99 (d, 1H, NH Ala<sup>1</sup>,  $J = 6.6$  Hz); 7.99 (s, 1H, H Thz<sup>4or8</sup>); 7.92 (s, 1H, H Thz<sup>4or8</sup>); 7.54 (d, 1H, NH D-Val<sup>7</sup>,  $J = 10.2$  Hz); 7.29 (d, 1H, NH D-Val<sup>3</sup>,  $J = 9.6$  Hz); 7.26-7.23 (m, 3H, ArH Phg<sup>5</sup>); 7.17-7.14 (m, 2H, ArH Phg<sup>5</sup>); 5.91 (dd, 1H,  $^{\alpha}H$  Phg<sup>5</sup>,  $J = 8.4, 1.2$  Hz); 5.19 (dd, 1H,  $^{\alpha}H$  D-Val<sup>7</sup>,  $J = 10.2, 6.6$  Hz); 5.10 (dd, 1H,  $^{\alpha}H$  D-Val<sup>3</sup>,  $J = 9.6, 6.6$  Hz); 4.74 (quint., 1H,  $^{\beta}H$  Oxz<sup>6</sup>,  $J = 6.0$  Hz); 4.72 (quint.d, 1H,  $^{\alpha}H$  Ala<sup>1</sup>,  $J = 6.6, 1.2$  Hz); 4.60 (quint., 1H,  $^{\beta}H$  Oxz<sup>2</sup>,  $J = 6.0$  Hz); 4.39 (dd, 1H,  $^{\alpha}H$  Oxz<sup>6</sup>,  $J = 6.0, 1.2$  Hz); 4.20 (dd, 1H,  $^{\alpha}H$  Oxz<sup>2</sup>,  $J = 6.0, 1.2$  Hz); 2.31 (oct., 1Hx2,  $^{\beta}H$  D-Val<sup>3,7</sup>,  $J = 6.6$  Hz); 1.45 (d, 3H,  $^{\gamma}H$  Oxz<sup>6</sup>,  $J = 6.0$  Hz); 1.21 (d, 3H,  $^{\gamma}H$  Oxz<sup>2</sup>,  $J = 6.0$  Hz); 1.13 (d, 3H,  $^{\gamma^1}H$  D-Val<sup>7</sup>,  $J = 6.6$  Hz); 1.11 (d, 3H,  $^{\gamma^1}H$  D-Val<sup>3</sup>,  $J = 6.6$  Hz); 1.01 (d, 3H,  $^{\gamma^2}H$  D-Val<sup>7</sup>,  $J = 6.6$  Hz); 0.98 (d, 3H,  $^{\gamma^2}H$  D-Val<sup>3</sup>,  $J = 6.6$  Hz); 0.86 (d, 3H,  $^{\beta}H$  Ala<sup>1</sup>,  $J = 6.6$  Hz).

## $^1\text{H}$ NMR spectra of peptides 2b

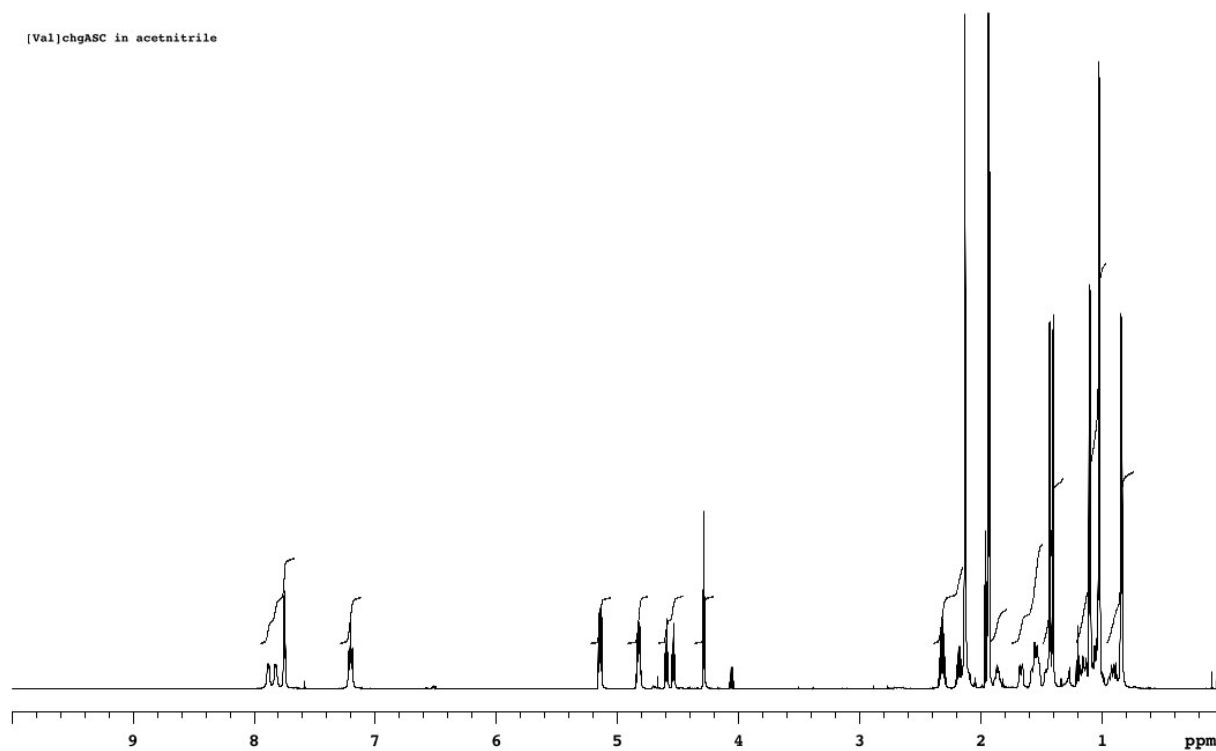

**Fig. S1** 1D  $^1\text{H}$  NMR spectrum of peptide **2b** in  $\text{CD}_3\text{CN}$  at 298 K.



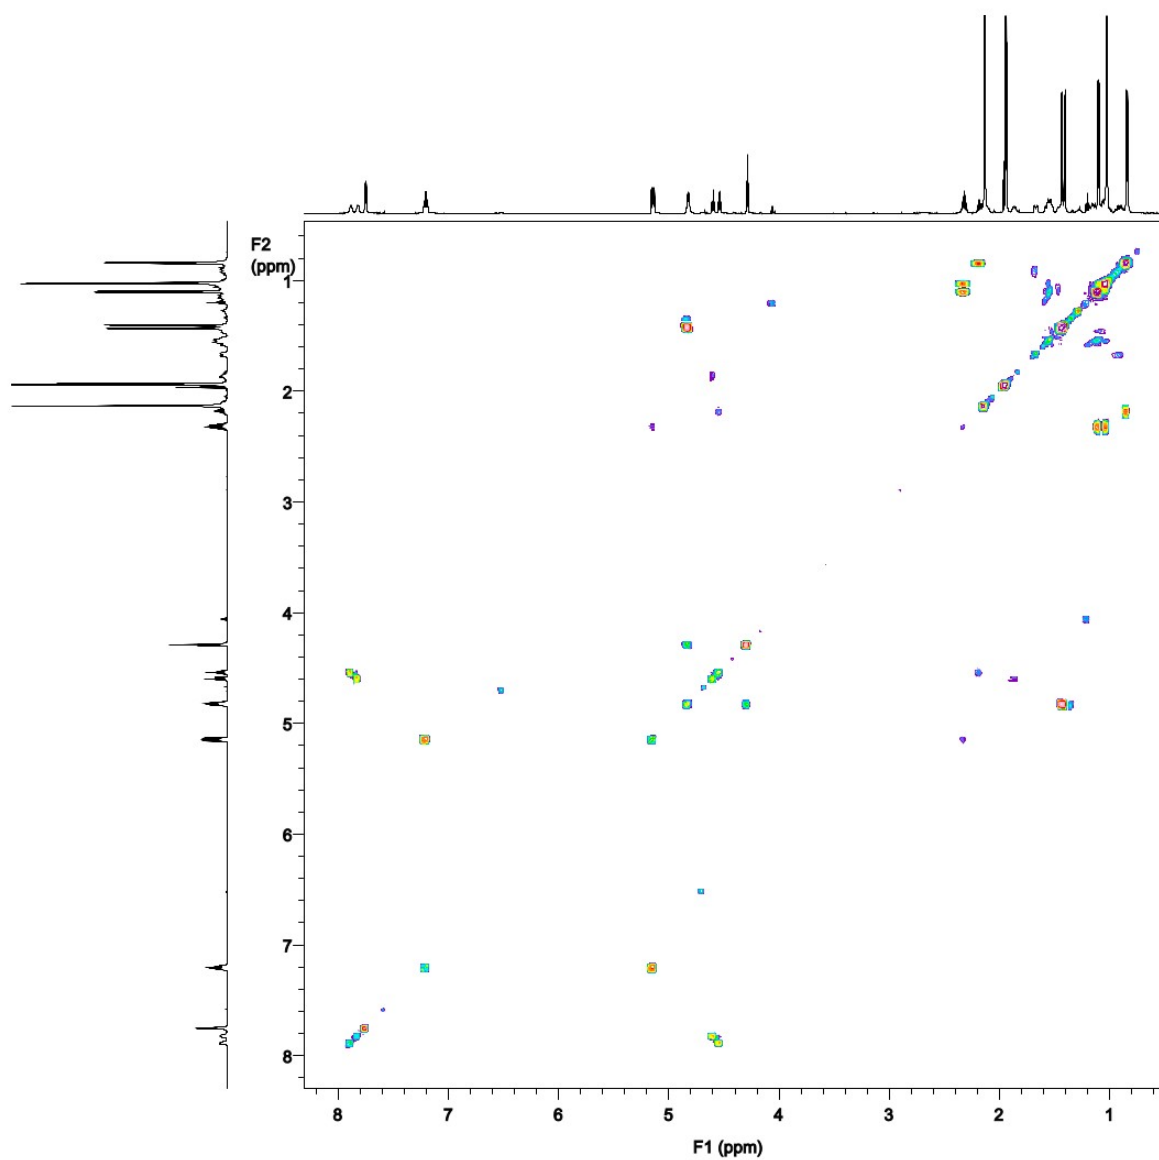

**Fig. S2** 2D  $^1\text{H}$ - $^1\text{H}$  COSY spectrum of peptide **2b** in  $\text{CD}_3\text{CN}$  at 298 K.

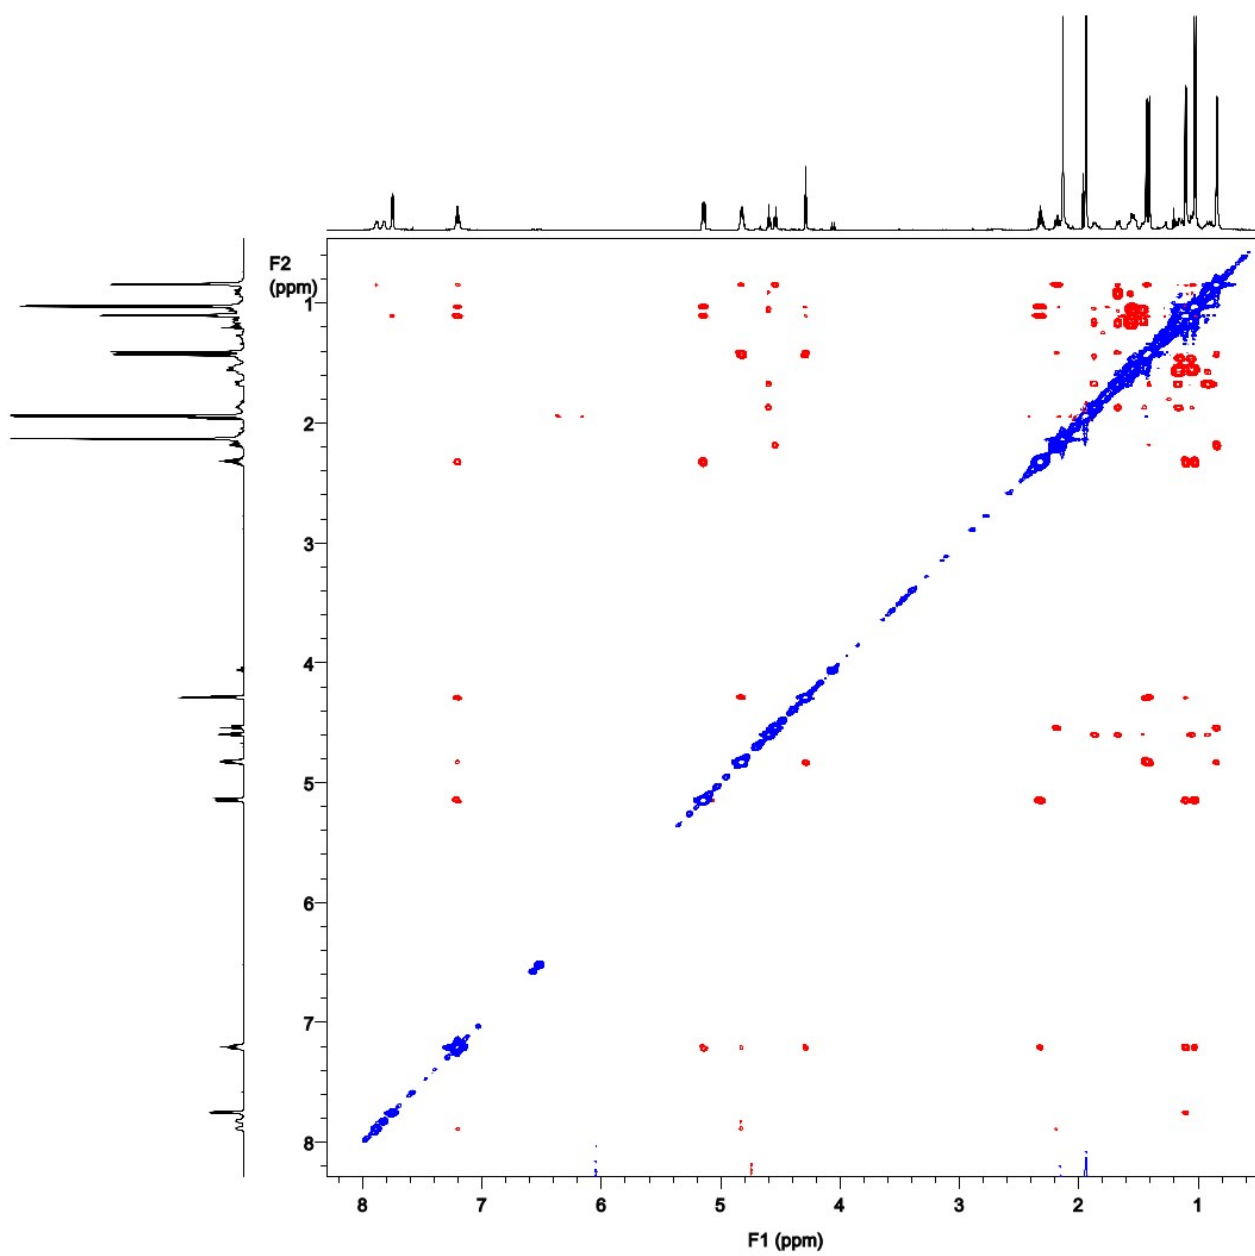

**Fig. S3** 2D  $^1\text{H}$ - $^1\text{H}$  ROESY spectrum of peptide **2b** in  $\text{CD}_3\text{CN}$  at 298 K.

# <sup>1</sup>H NMR spectra of peptides 3b

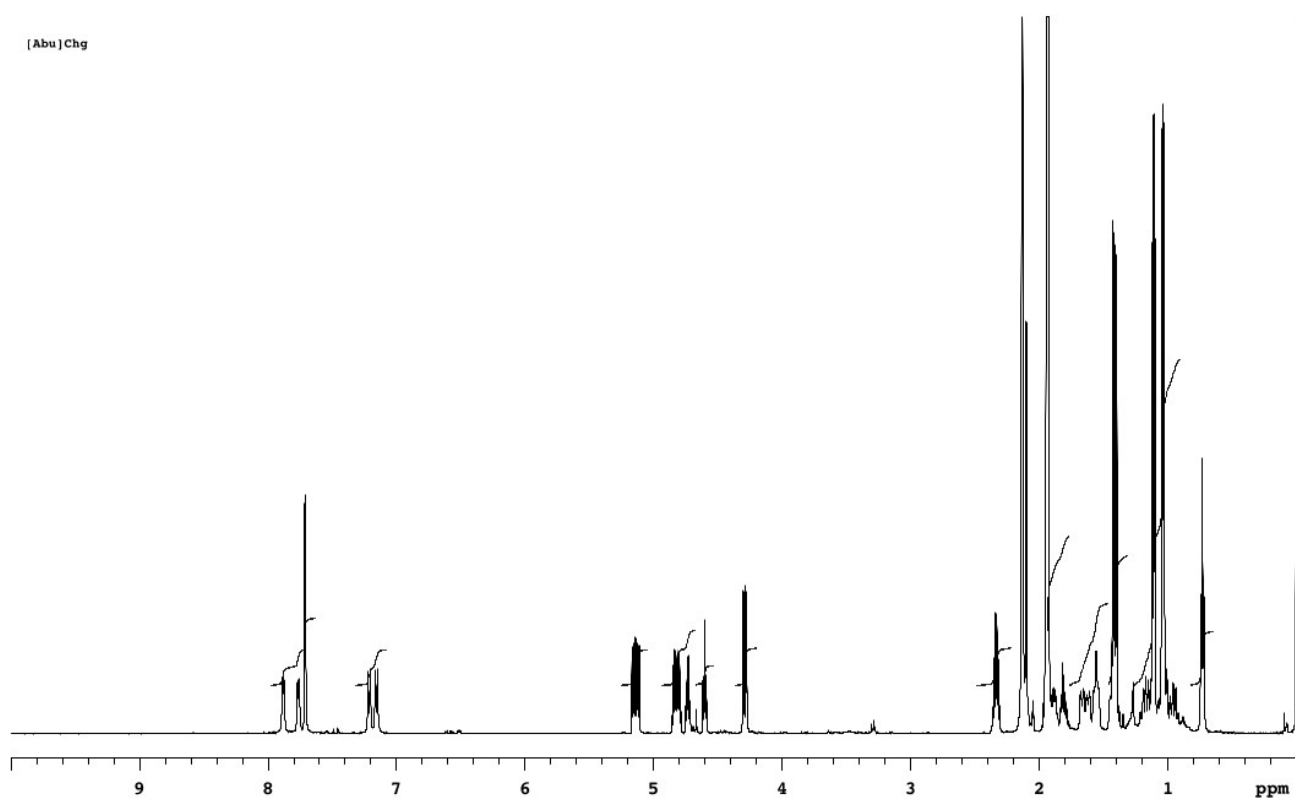

**Fig. S4** 1D <sup>1</sup>H NMR spectrum of peptide **3b** in CD<sub>3</sub>CN at 298 K.

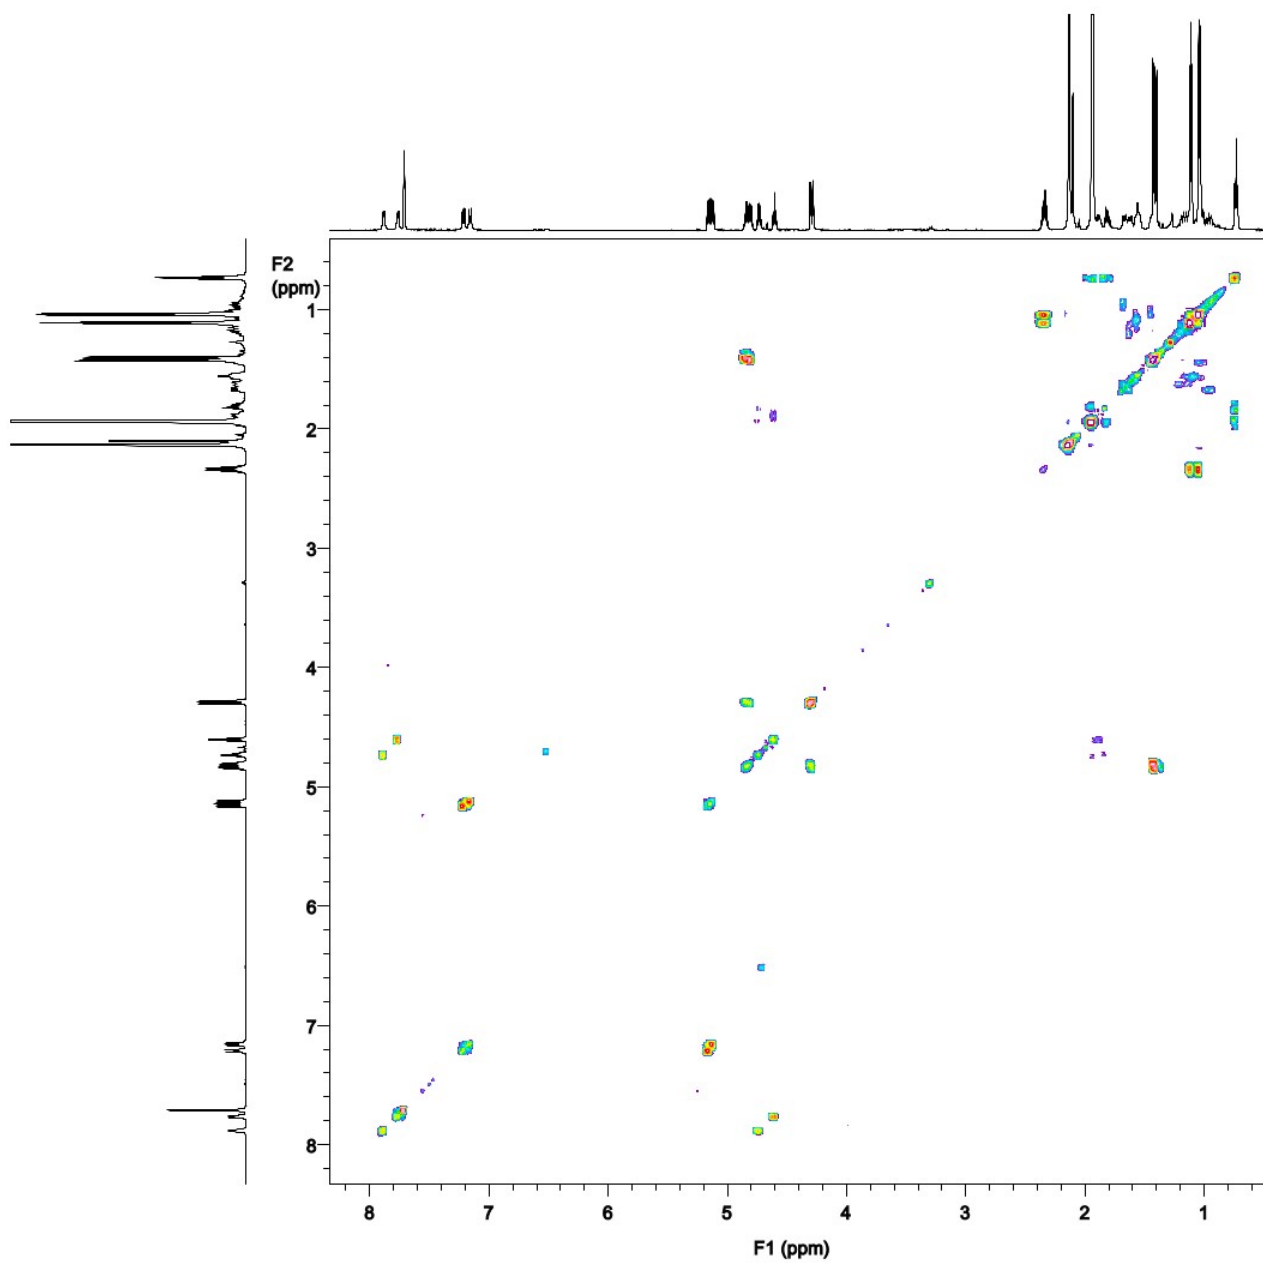

**Fig. S5** 2D  $^1\text{H}$ - $^1\text{H}$  COSY spectrum of peptide **3b** in  $\text{CD}_3\text{CN}$  at 298 K.

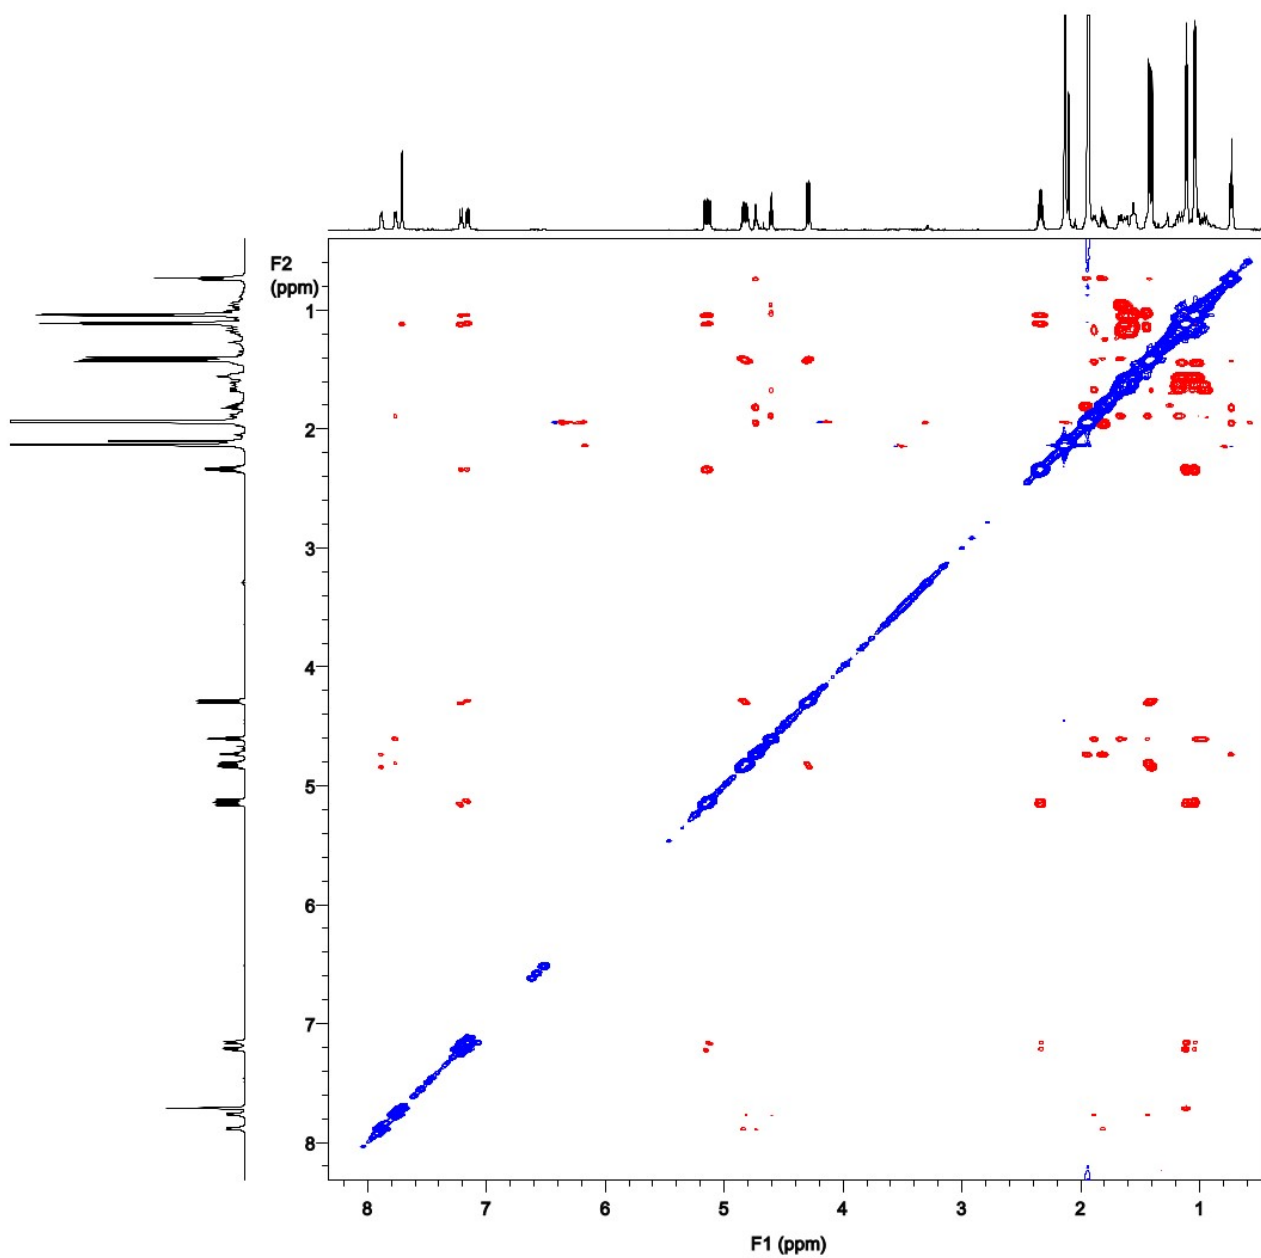

**Fig. S6** 2D  $^1\text{H}$ - $^1\text{H}$  ROESY spectrum of peptide **3b** in  $\text{CD}_3\text{CN}$  at 298 K.

## <sup>1</sup>H NMR spectra of peptides 4b

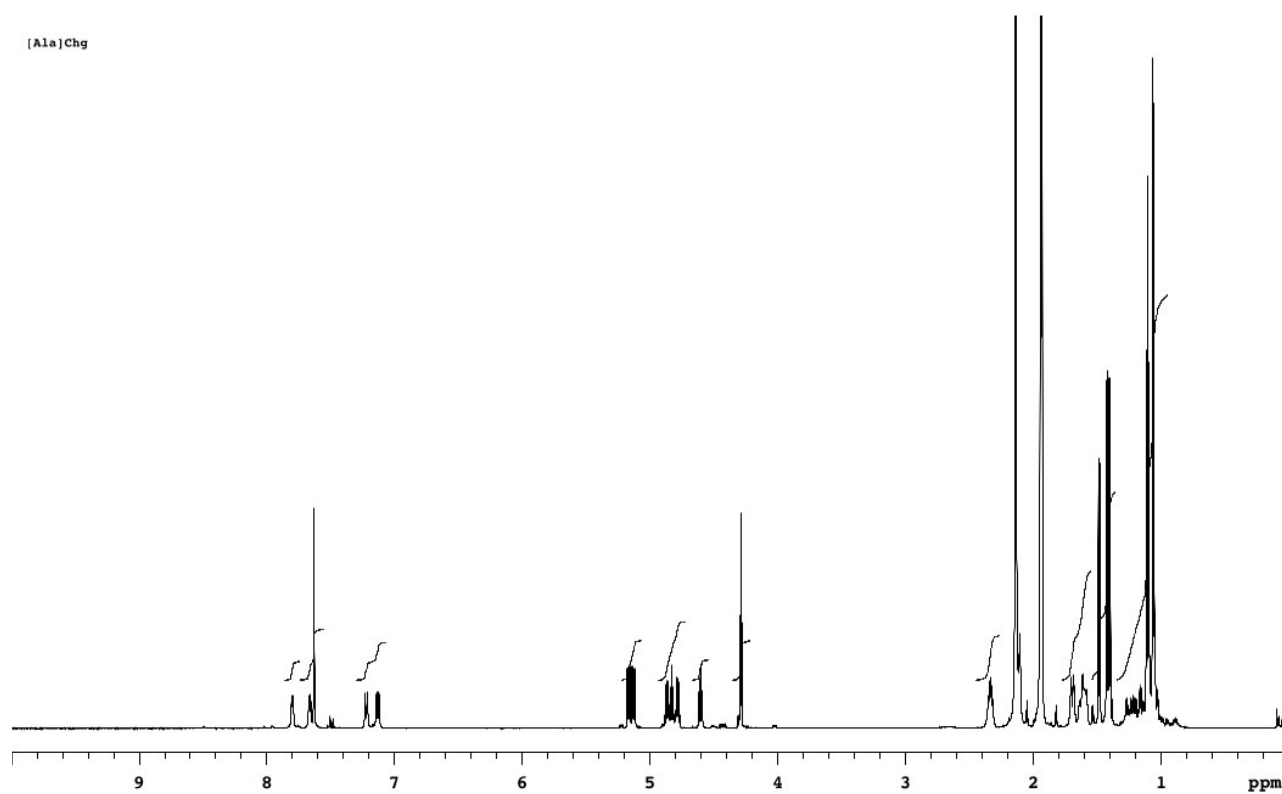

**Fig. S7** 1D <sup>1</sup>H NMR spectrum of peptide **4b** in CD<sub>3</sub>CN at 298 K.

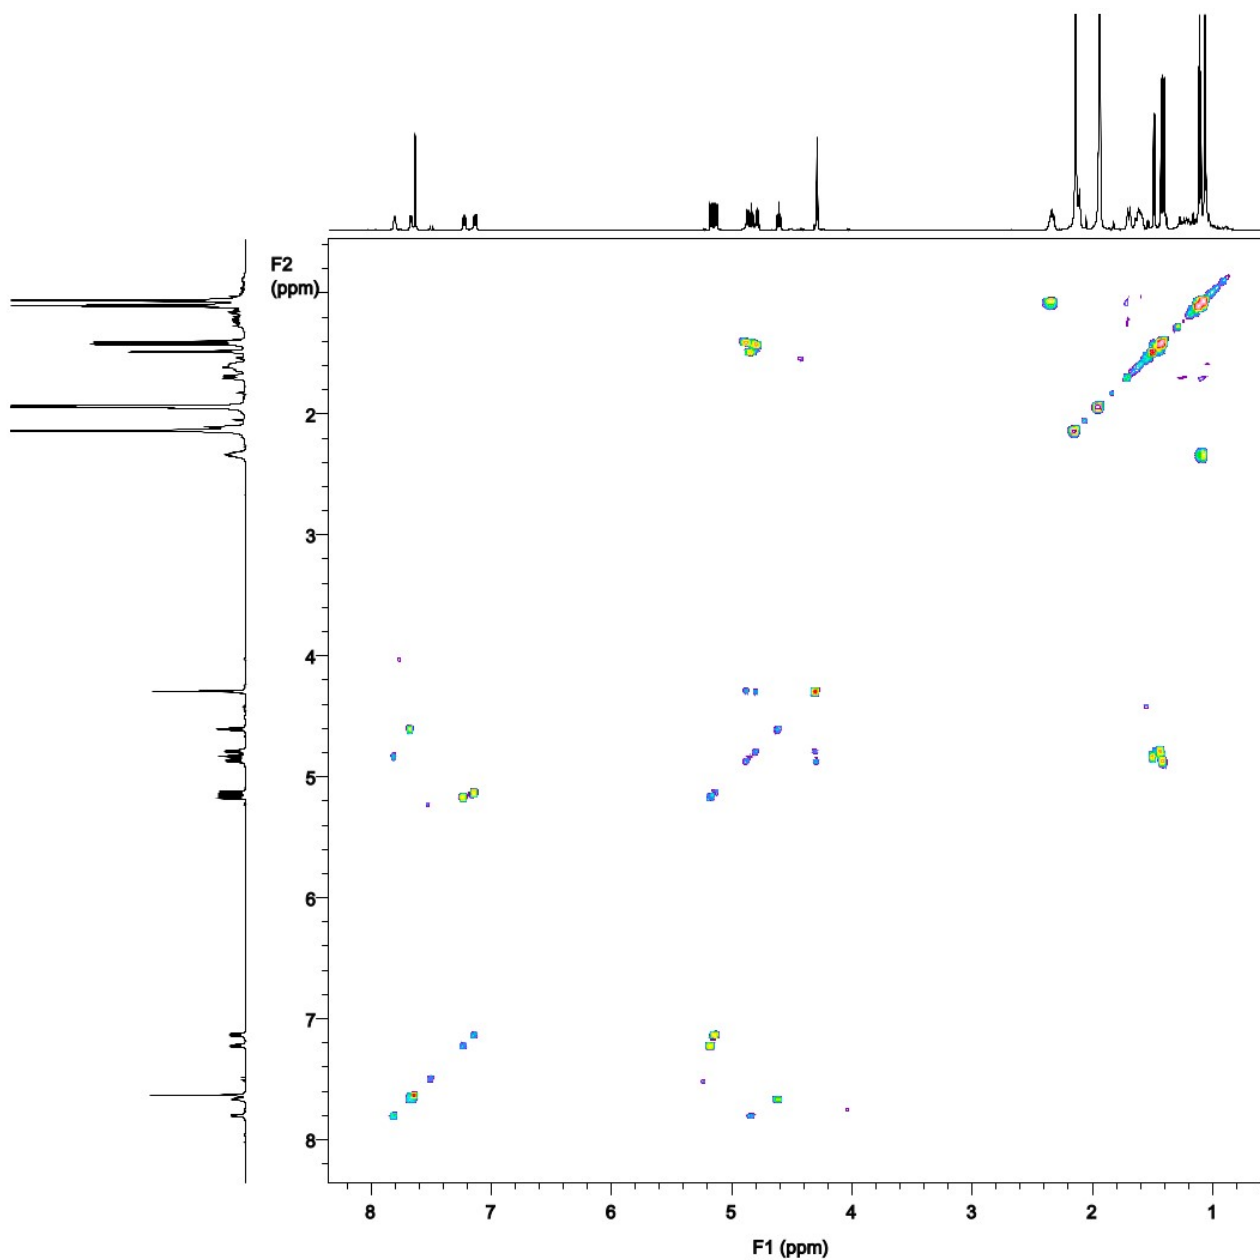

**Fig. S8** 2D  $^1\text{H}$ - $^1\text{H}$  COSY spectrum of peptide **4b** in  $\text{CD}_3\text{CN}$  at 298 K.

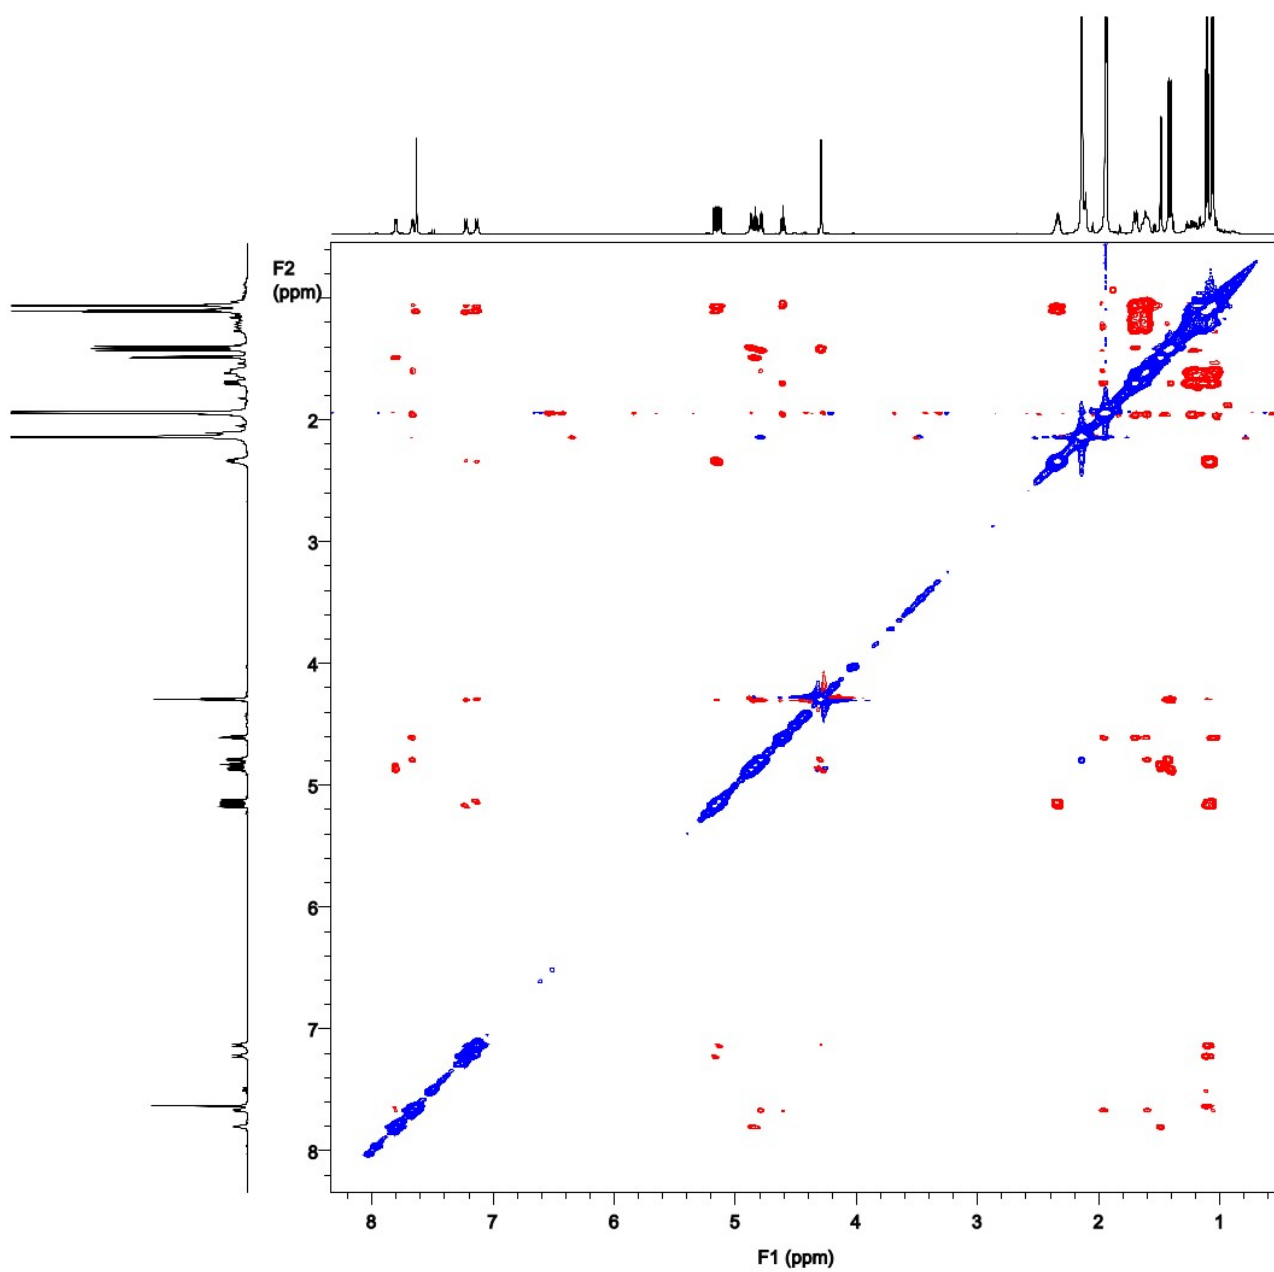

**Fig. S9** 2D  $^1\text{H}$ - $^1\text{H}$  ROESY spectrum of peptide **4b** in  $\text{CD}_3\text{CN}$  at 298 K.



# <sup>1</sup>H NMR spectra of peptides 2c

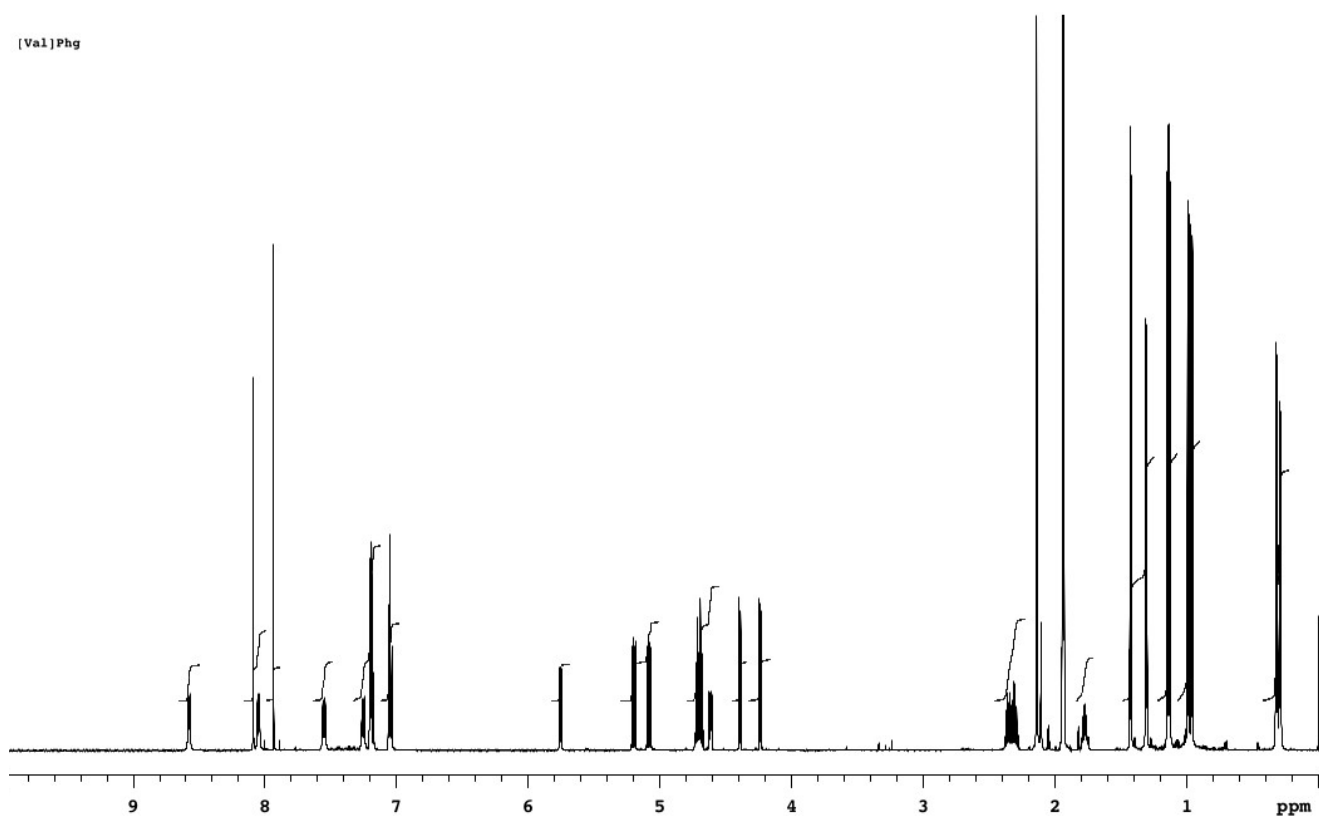

**Fig. S10** 1D <sup>1</sup>H NMR spectrum of peptide **2c** in CD<sub>3</sub>CN at 298 K.

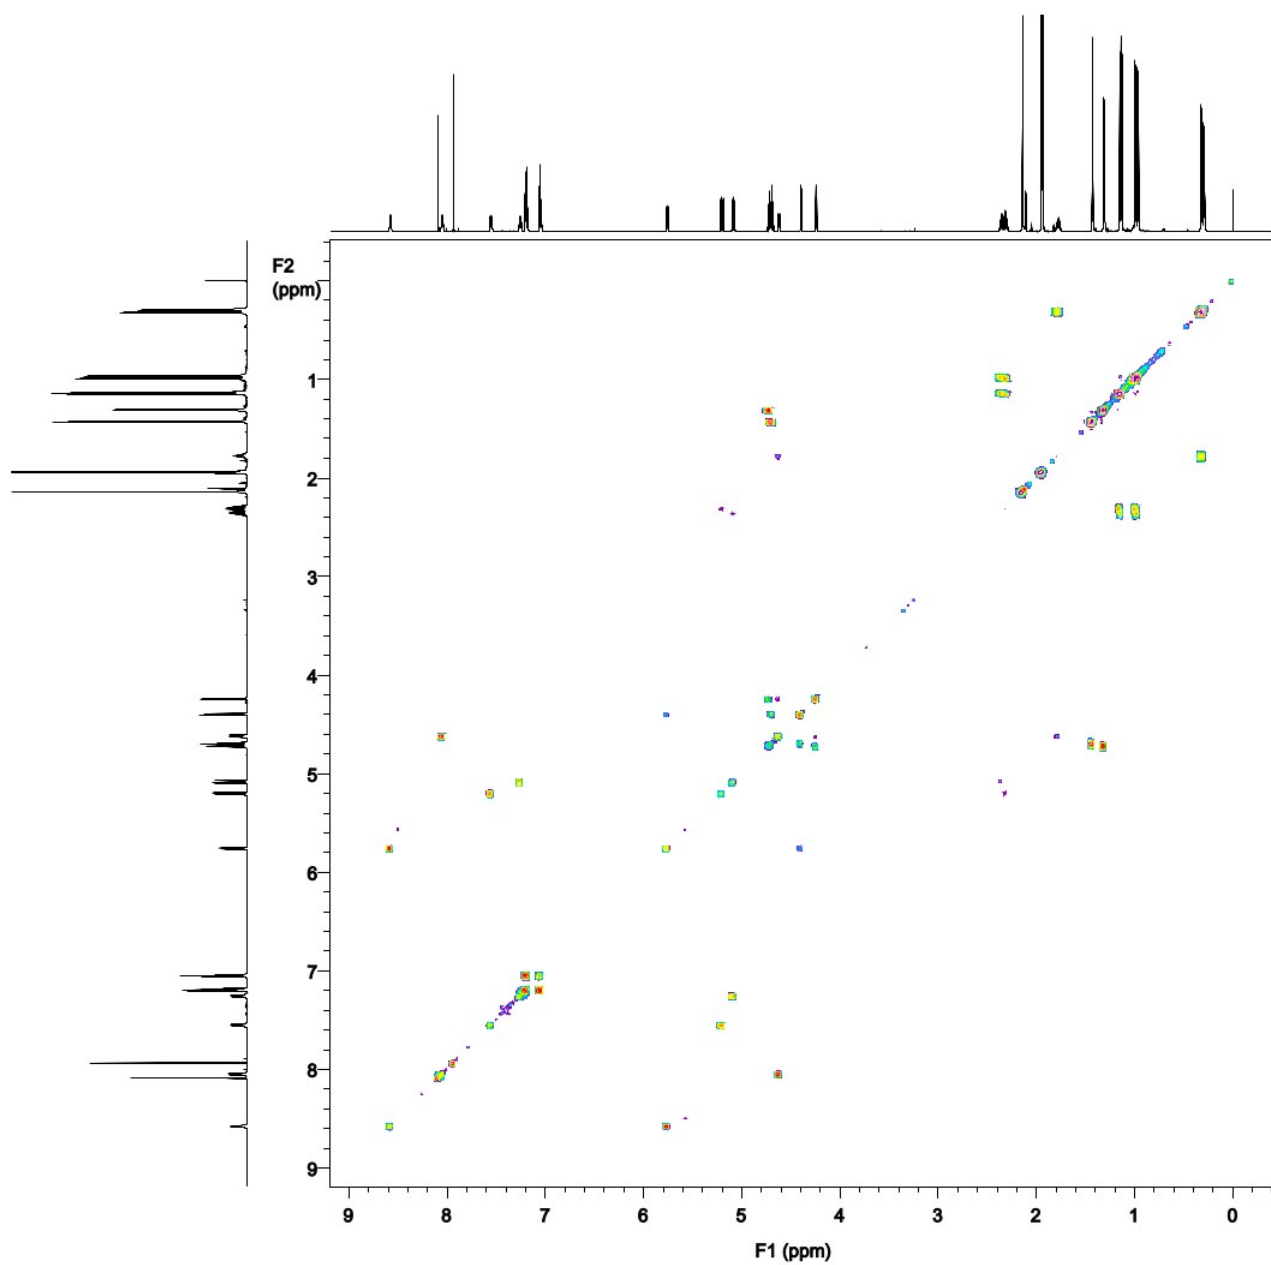

**Fig. S11** 2D  $^1\text{H}$ - $^1\text{H}$  COSY spectrum of peptide **2c** in  $\text{CD}_3\text{CN}$  at 298 K.

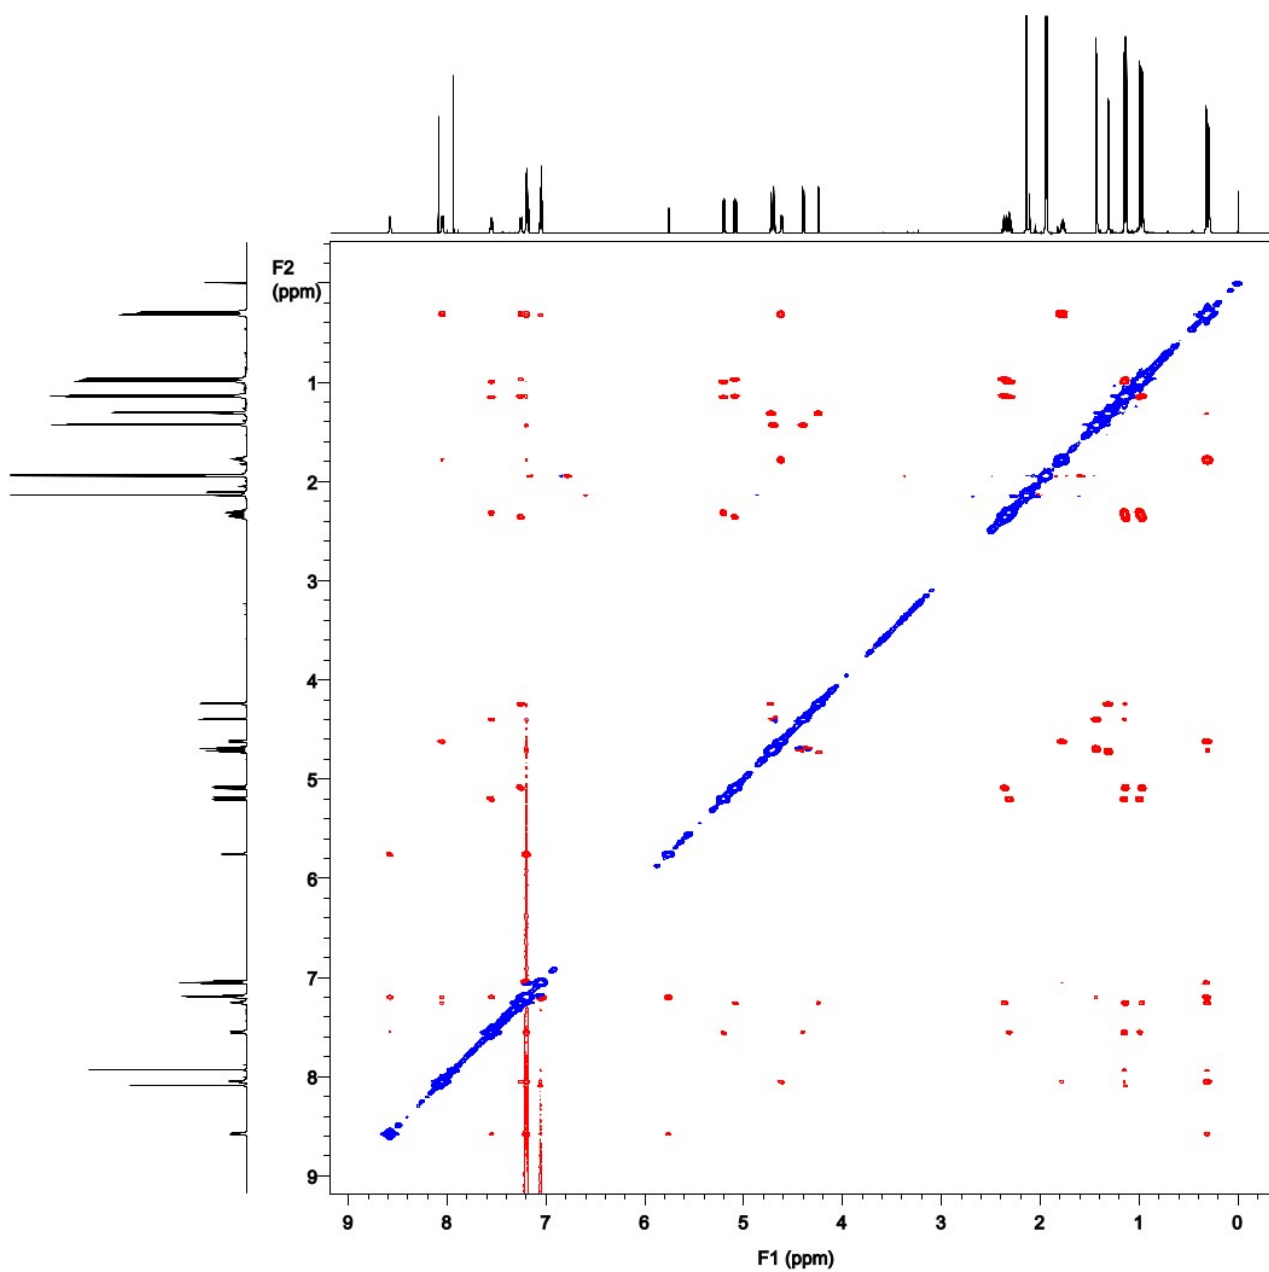

**Fig. S12** 2D  $^1\text{H}$ - $^1\text{H}$  ROESY spectrum of peptide **2c** in  $\text{CD}_3\text{CN}$  at 298 K.

# <sup>1</sup>H NMR spectra of peptides 3c

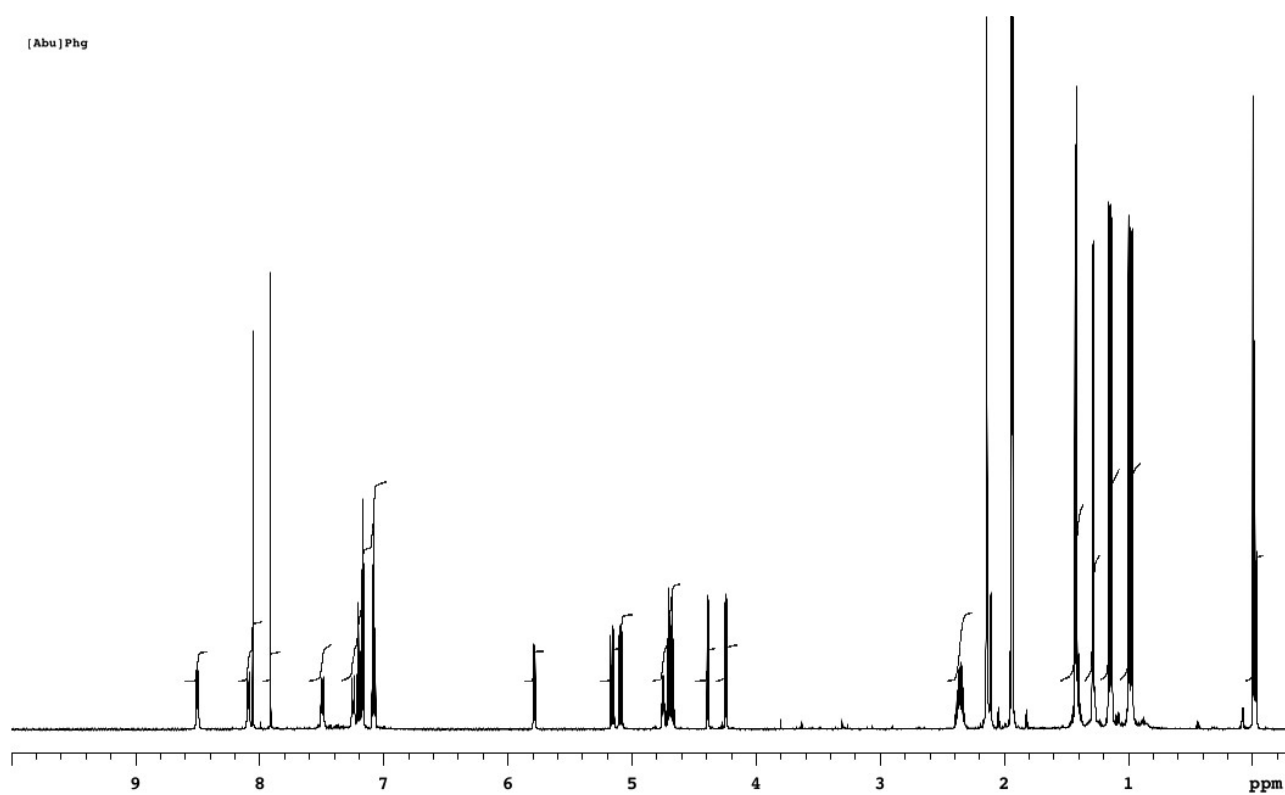

**Fig. S13** 1D <sup>1</sup>H NMR spectrum of peptide **3c** in CD<sub>3</sub>CN at 298 K.

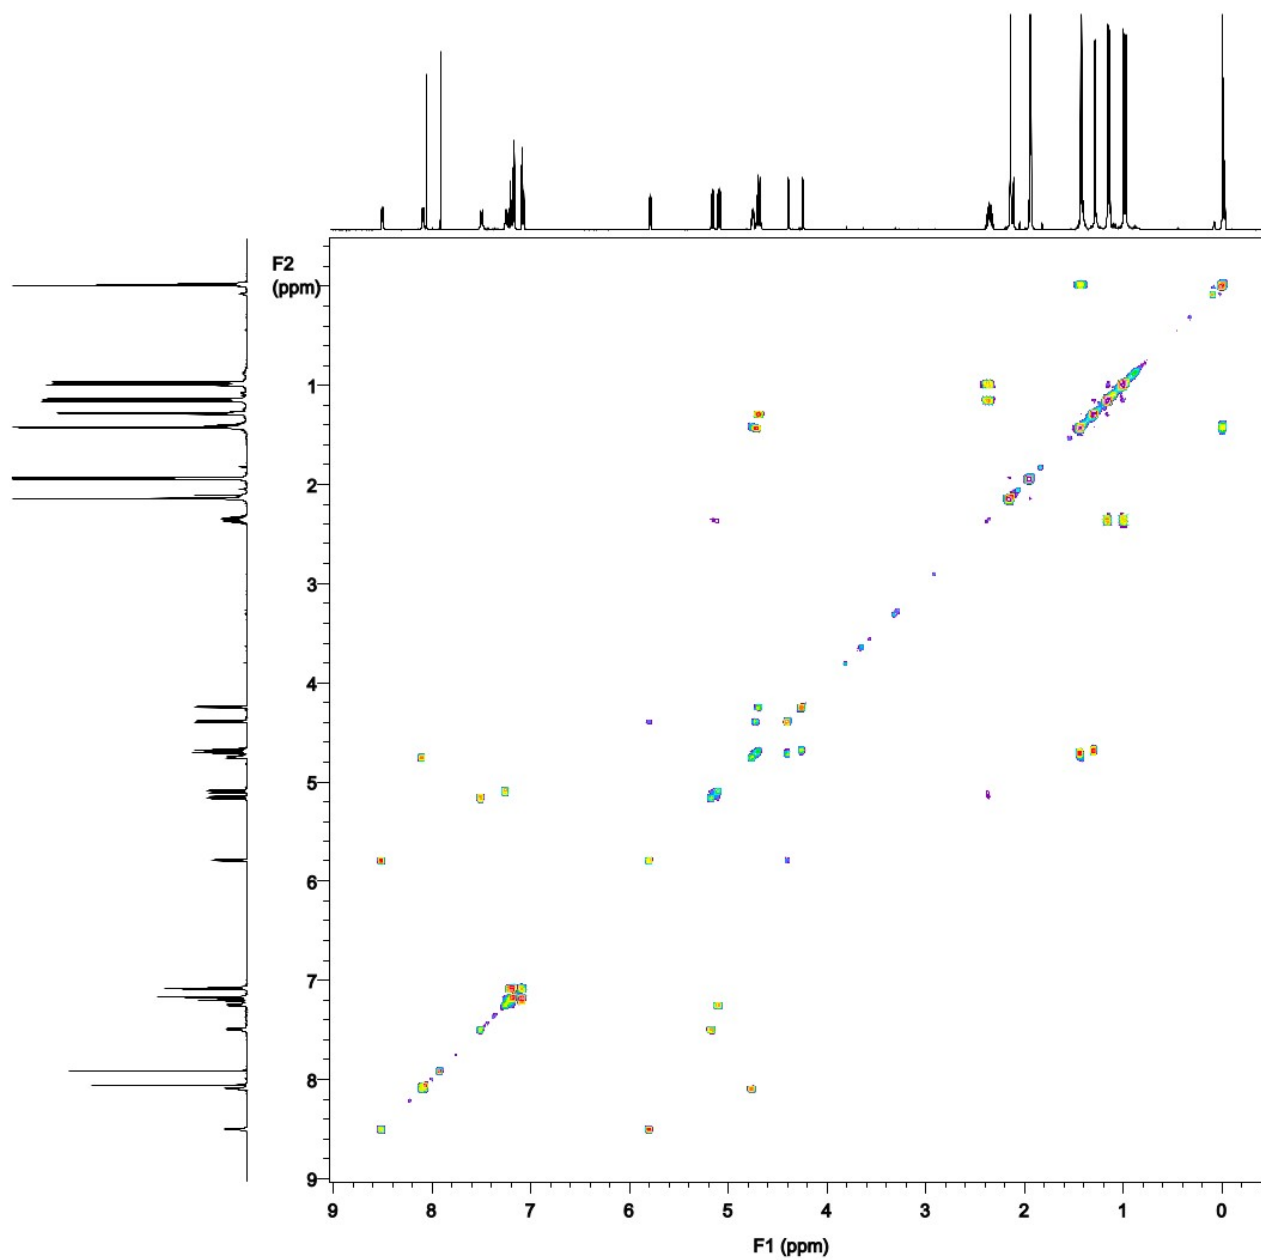

**Fig. S14** 2D  $^1\text{H}$ - $^1\text{H}$  COSY spectrum of peptide **3c** in  $\text{CD}_3\text{CN}$  at 298 K.

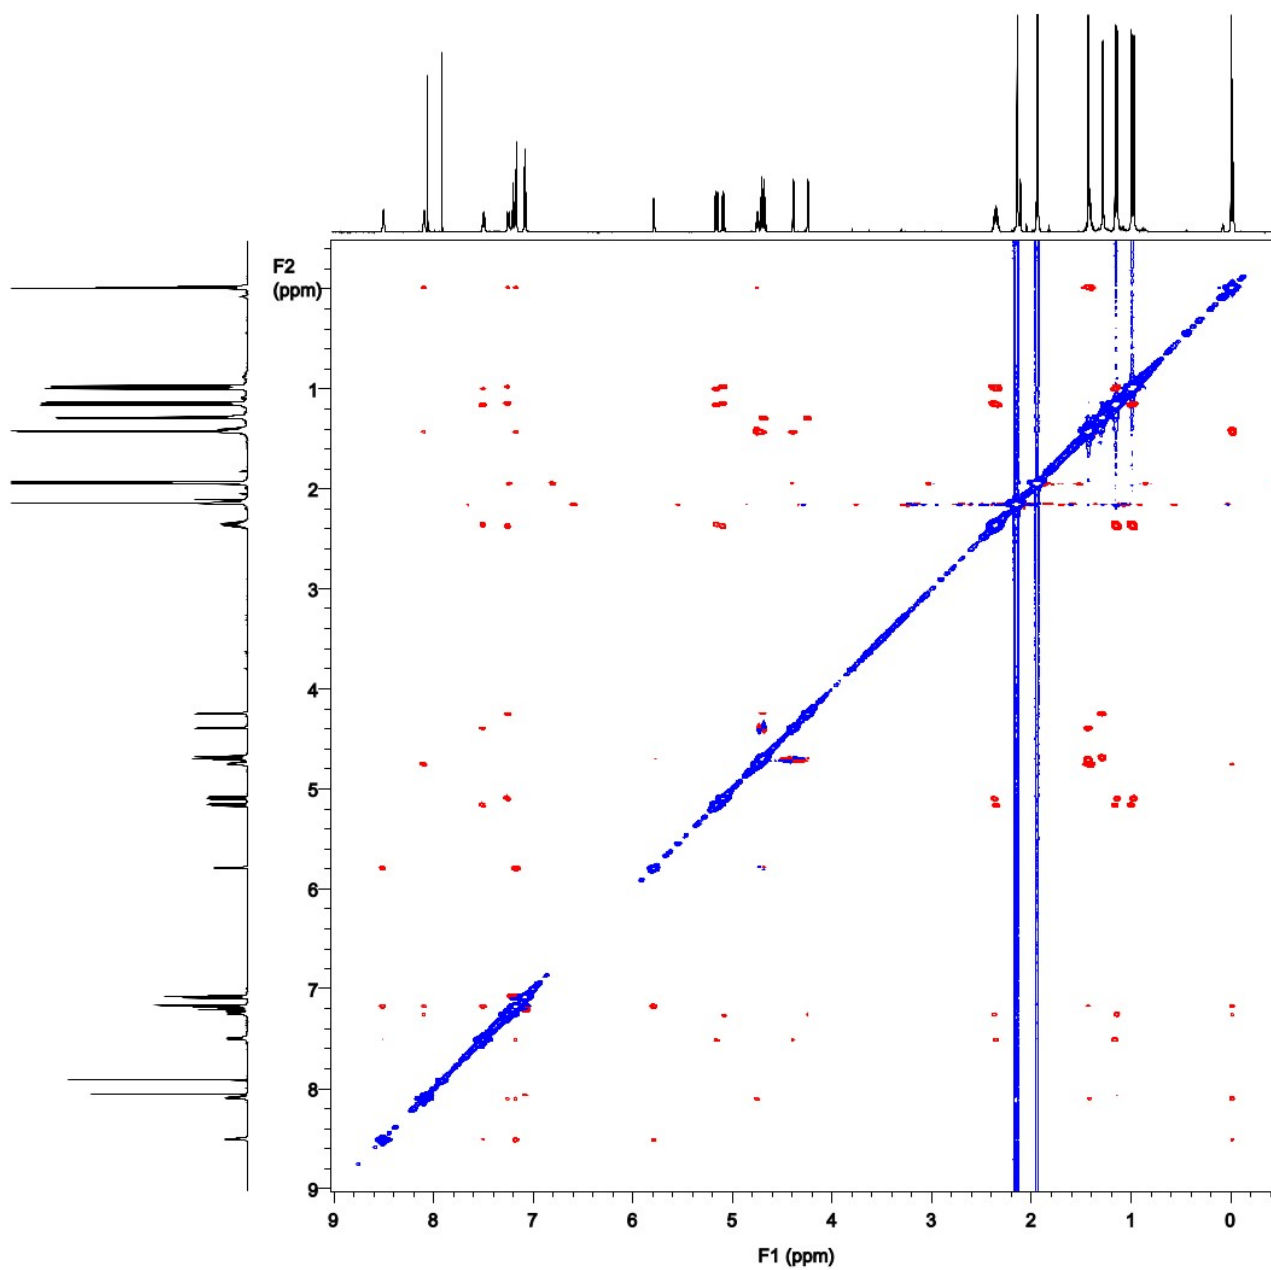

**Fig. S15** 2D  $^1\text{H}$ - $^1\text{H}$  ROESY spectrum of peptide **3c** in  $\text{CD}_3\text{CN}$  at 298 K.

# <sup>1</sup>H NMR spectra of peptides 4c

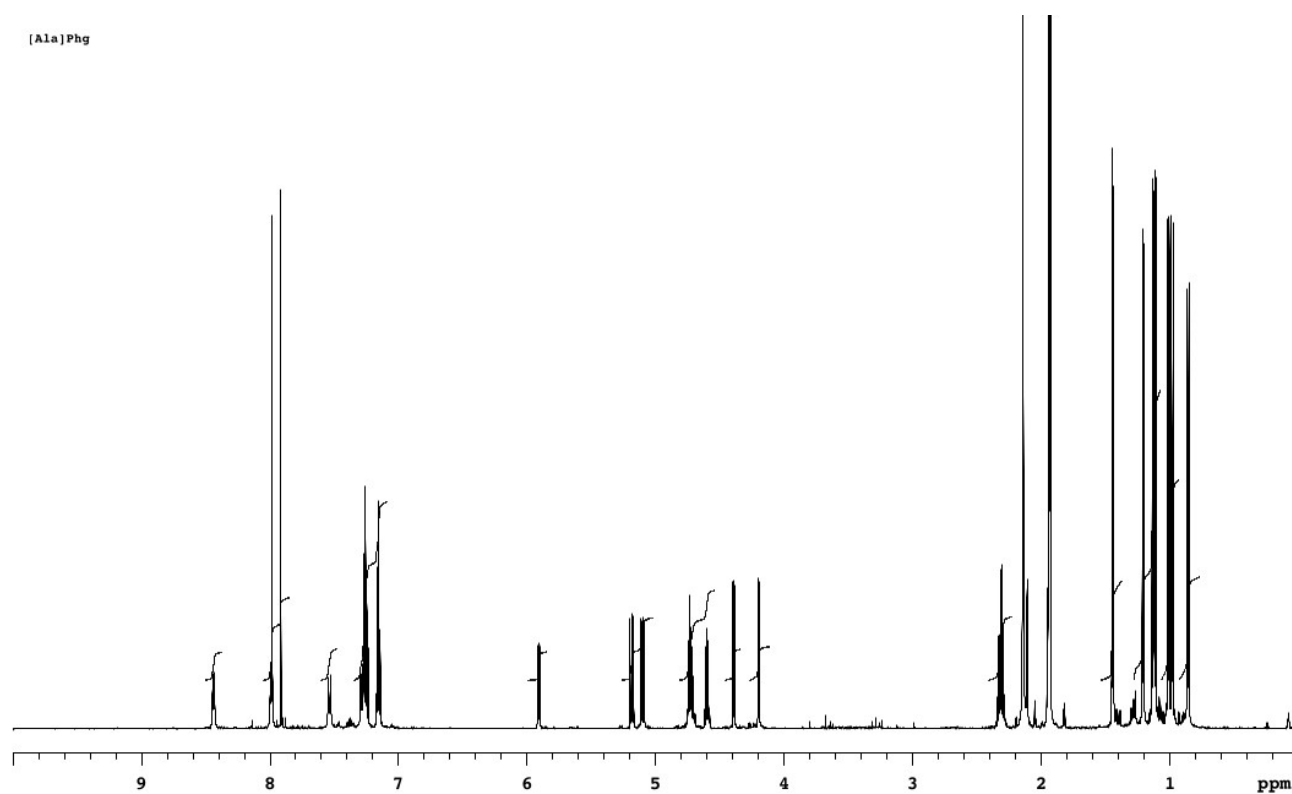

**Fig. S16** 1D <sup>1</sup>H NMR spectrum of peptide **4c** in CD<sub>3</sub>CN at 298 K.

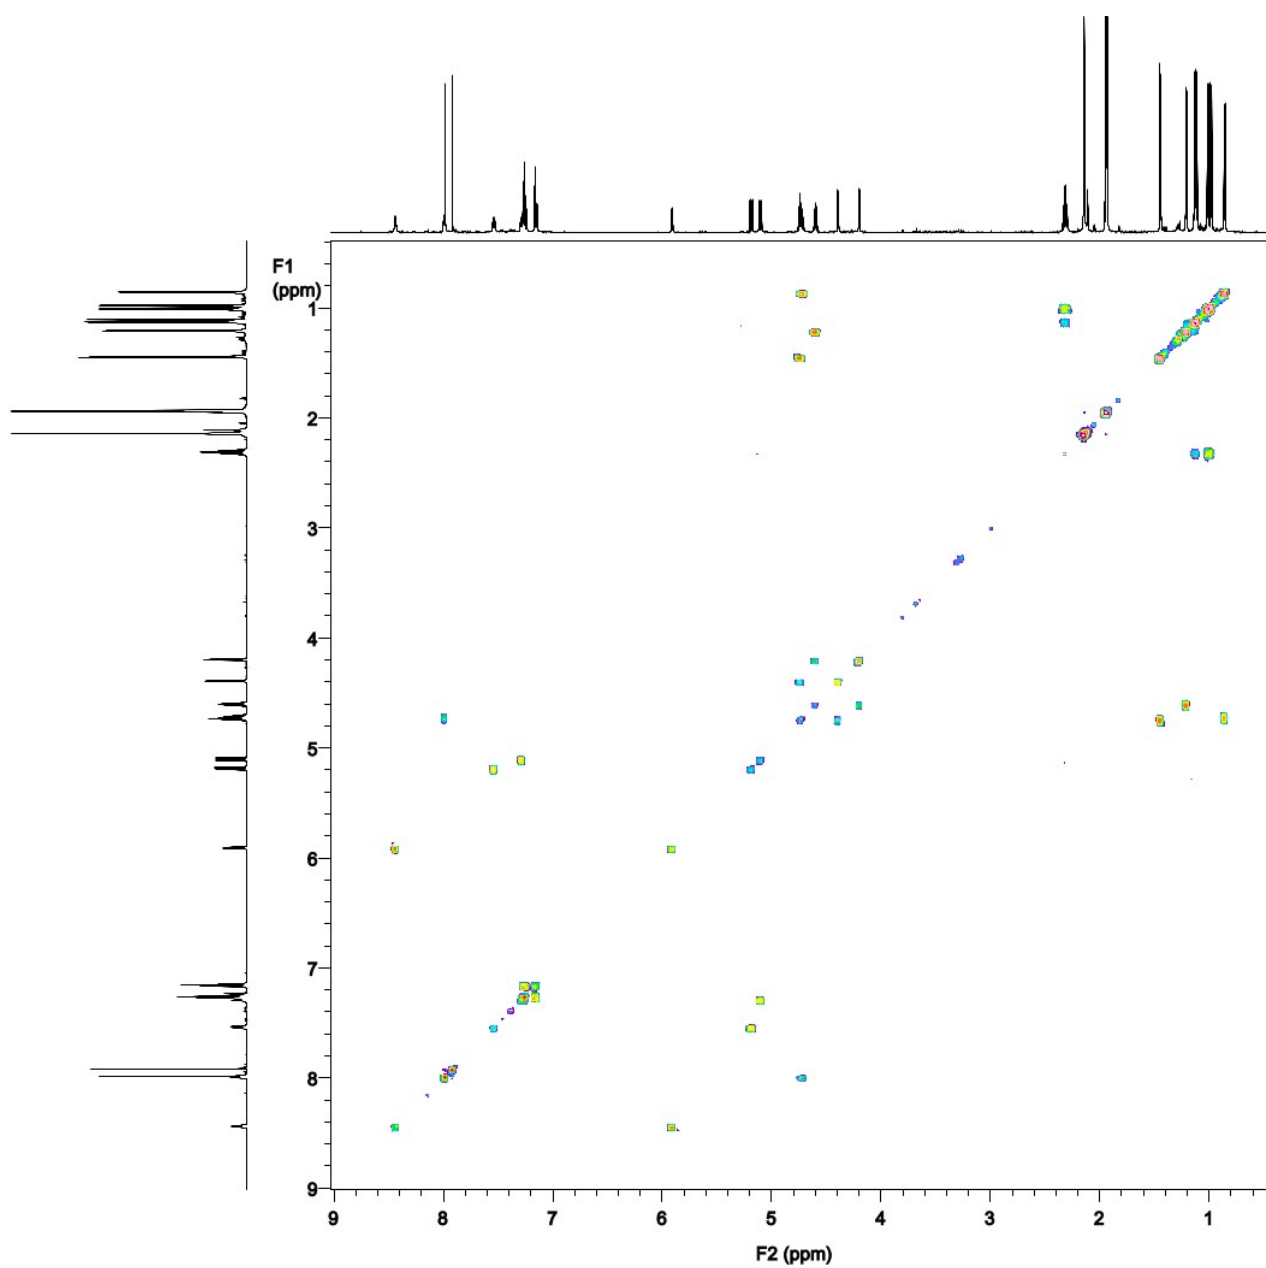

**Fig. S17** 2D  $^1\text{H}$ - $^1\text{H}$  COSY spectrum of peptide 4c in  $\text{CD}_3\text{CN}$  at 298 K.



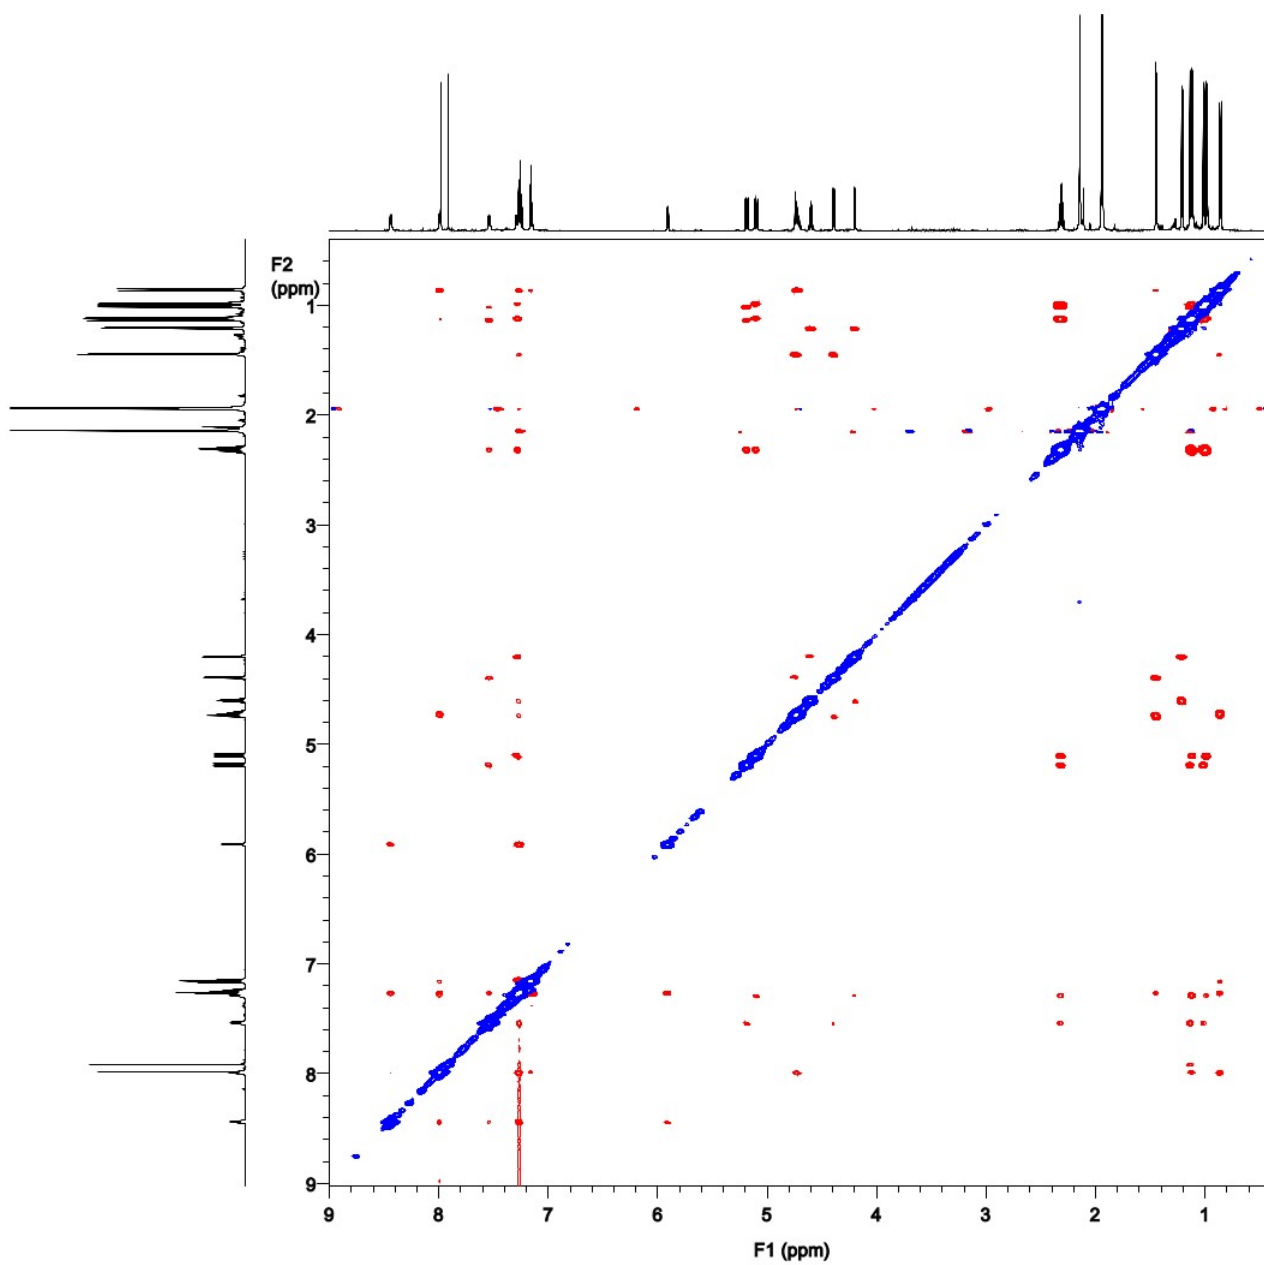

**Fig. S18** 2D  $^1\text{H}$ - $^1\text{H}$  ROESY spectrum of peptide **4c** in  $\text{CD}_3\text{CN}$  at 298 K.

## Crystallographic data for peptides **2b** and **2c**.

**Table S1.** Crystal and experimental data for **2b** and **2c**.

| Peptide                                                  | <b>2b</b>                                                                                                          | <b>2c</b>                                                                                                          |
|----------------------------------------------------------|--------------------------------------------------------------------------------------------------------------------|--------------------------------------------------------------------------------------------------------------------|
| Formula                                                  | C <sub>37</sub> H <sub>52</sub> N <sub>8</sub> O <sub>6</sub> S <sub>2</sub> ,<br>C <sub>4</sub> H <sub>9</sub> NO | C <sub>38</sub> H <sub>47</sub> N <sub>8</sub> O <sub>6</sub> S <sub>2</sub> ,<br>C <sub>4</sub> H <sub>9</sub> NO |
| Formula Weight                                           | 856.11                                                                                                             | 863.08                                                                                                             |
| Cell System                                              | monoclinic                                                                                                         | monoclinic                                                                                                         |
| Space Group                                              | P2 <sub>1</sub>                                                                                                    | C2                                                                                                                 |
| <i>a</i> , Å                                             | 12.012(2)                                                                                                          | 18.269(6)                                                                                                          |
| <i>b</i> , Å                                             | 12.909(3)                                                                                                          | 12.967(4)                                                                                                          |
| <i>c</i> , Å                                             | 14.885(3)                                                                                                          | 11.641(4)                                                                                                          |
| $\alpha$ , deg                                           | 90.00                                                                                                              | 90.00                                                                                                              |
| $\beta$ , deg                                            | 97.85(3)                                                                                                           | 123.754(4)                                                                                                         |
| $\gamma$ , deg                                           | 90.00                                                                                                              | 90.00                                                                                                              |
| Volume, Å <sup>3</sup>                                   | 2286.5(8)                                                                                                          | 2292.9(13)                                                                                                         |
| <i>Z</i>                                                 | 2                                                                                                                  | 2                                                                                                                  |
| <i>D<sub>c</sub></i> , g cm <sup>-3</sup>                | 1.243                                                                                                              | 1.250                                                                                                              |
| <i>F</i> (000)                                           | 916                                                                                                                | 918                                                                                                                |
| $\mu$ , mm <sup>-1</sup>                                 | 1.518(Cu K $\alpha$ )                                                                                              | 0.173 (Mo K $\alpha$ )                                                                                             |
| Wavelength, Å                                            | 1.54184                                                                                                            | 0.71073                                                                                                            |
| No. of reflections (obs)                                 | 8579                                                                                                               | 3907                                                                                                               |
| <i>R</i> <sub>INT</sub>                                  | 0.0818                                                                                                             | 0.0362                                                                                                             |
| $\theta$ <sub>max</sub> , deg                            | 70.07                                                                                                              | 25.02                                                                                                              |
| No. of reflections ( <i>I</i> > 2 $\sigma$ ( <i>I</i> )) | 8214                                                                                                               | 3055                                                                                                               |
| Flack parameter                                          | 0.005 (18)                                                                                                         | -0.3(3)                                                                                                            |
| <i>R</i> 1                                               | 0.0644                                                                                                             | 0.1071                                                                                                             |
| <i>wR</i>                                                | 0.1733                                                                                                             | 0.2655                                                                                                             |
| Goodness of fit                                          | 0.744                                                                                                              | 1.141                                                                                                              |
| ( $\Delta/\sigma$ ) <sub>max</sub>                       | 0.002                                                                                                              | 0.017                                                                                                              |
| Fraction for $\theta$ <sub>max</sub>                     | 1.000                                                                                                              | 0.997                                                                                                              |
| $\Delta\rho$ <sub>max</sub> , e Å <sup>-3</sup>          | 0.959                                                                                                              | 0.660                                                                                                              |
| $\Delta\rho$ <sub>min</sub> , e Å <sup>-3</sup>          | -0.334                                                                                                             | -0.691                                                                                                             |
| CCDC Number                                              | 2191404                                                                                                            | 2191405                                                                                                            |

## The CH $\cdots\pi$ contacts within the crystal structures of **1c** and **2c**

The distances between the side chains of Xaa<sup>1</sup> and Phg<sup>5</sup> were estimated by surveying the CH $\cdots\pi$  contacts for the six-membered  $\pi$ -system, as described by Umezawa *et al.* (Y. Umezawa *et al.*, *Bull. Chem. Soc. Jpn.*, 1998, **71**, 1207-1213) (Fig. S19). The distance between a C-H hydrogen atom and the  $\pi$ -plane, the distance between H and the line C<sup>1</sup>-C<sup>2</sup>, and the H/C<sup>1</sup> interatomic distance are defined as  $D_{\text{pln}}$ ,  $D_{\text{lin}}$  and  $D_{\text{atm}}$ , respectively. These distance parameters ( $D_{\text{pln}}$ ,  $D_{\text{lin}}$  and  $D_{\text{atm}}$ ) correspond to regions 1, 2 and 3, respectively. A C-H hydrogen atom is positioned above the  $\pi$ -plane in region 1 or at a position where it is able to contact the  $\pi$ -orbital in regions 2 and 3. An alkyl group can interact with the  $\pi$ -group in regions where the hydrogen atom is above the  $\pi$ -plane but slightly offset, outside the ring. The dihedral angles determined by the  $\pi$ -plane, plane H-C<sup>1</sup>-C<sup>2</sup> and angle  $\angle\text{H-X-C}^1$  (X=C, O, etc.) are defined as  $\omega$  and  $\theta$ , respectively. The distances from the H atoms of the Xaa<sup>1</sup> alkyl side chain to the  $\pi$ -orbital of the Phg<sup>5</sup> residue in the crystal structures of **1c** and **2c** are listed in Table 2.

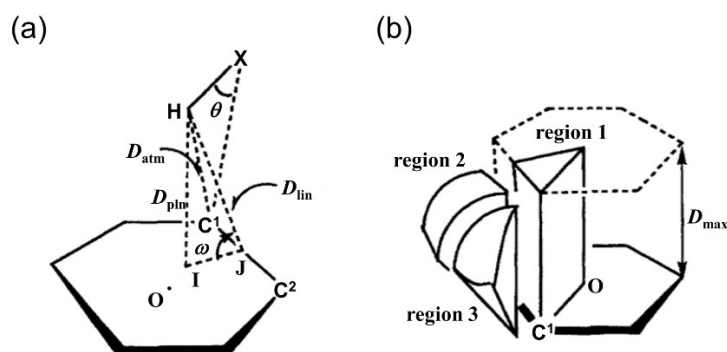

**Fig. S19** Method for surveying CH $\cdots\pi$  contacts in a six-membered  $\pi$ -system (Y. Umezawa *et al.*, *Bull. Chem. Soc. Jpn.*, 1998, **71**, 1207-1213). (a) O: center of the plane. C<sup>1</sup> and C<sup>2</sup>: nearest and second nearest sp<sup>2</sup>-carbons to H.  $\omega$ : dihedral angle defined by the C<sup>1</sup>OC<sup>2</sup> and HC<sup>1</sup>C<sup>2</sup> planes.  $\theta$ :  $\angle\text{HXC}^1$ .  $D_{\text{pln}}$ : H/ $\pi$ -plane distance (H/I).  $D_{\text{atm}}$ : interatomic distance (H/C<sup>1</sup>).  $D_{\text{lin}}$ : distance between H and line C<sup>1</sup>C<sup>2</sup> (H/J). (b) 1: region where H is above the aromatic ring. 2 and 3: regions where H is outside region 1 but may interact with the  $\pi$ -orbitals.  $D_{\text{pln}} < D_{\text{max}}$ ,  $\theta < 60^\circ$ ,  $|\omega| < 90^\circ$  for region 1;  $D_{\text{lin}} > D_{\text{max}}$ ,  $\theta < 60^\circ$ ,  $90^\circ < |\omega| < 130^\circ$  for region 2; and  $D_{\text{atm}} < D_{\text{max}}$ ,  $\theta < 60^\circ$ ,  $50^\circ < \phi < 90^\circ$  for region 3 ( $\phi$ : HC<sup>1</sup>I). ( $\theta$

should be smaller than  $60^\circ$  to avoid contact of atom X with C<sup>1</sup>).  $D_{\max}$ : cutoff value in every region.

**Table S2.** The distances from the H atoms of Xaa<sup>1</sup> side chains to the  $\pi$ -orbital of the Phg<sup>5</sup> residue and angle parameters ( $\theta$  and  $\omega$ ) within the crystal structures of **1c** and **2c** were estimated by surveying the CH $\cdots\pi$  contacts in a six-membered  $\pi$ -system.

|                         | <b>1c</b> <sup>a</sup> (Ile <sup>1</sup> ) |                   |                   | <b>2c</b> (Val <sup>1</sup> ) |                   |
|-------------------------|--------------------------------------------|-------------------|-------------------|-------------------------------|-------------------|
|                         | $\beta$ H                                  | $\gamma^2$ H      | $\delta$ H        | $\beta$ H                     | $\gamma^1$ H      |
| $\theta$ ( $^\circ$ )   | 33.8                                       | 21.3              | 59.0              | 34.8                          | 33.6              |
| $\omega$ ( $^\circ$ )   | 115.6                                      | 108.7             | 89.2              | 119.7                         | 129.2             |
| Region                  | 2                                          | 2                 | 1                 | 2                             | 2                 |
| Distance ( $\text{Å}$ ) | 3.71 <sup>b</sup>                          | 3.17 <sup>b</sup> | 4.52 <sup>c</sup> | 4.00 <sup>b</sup>             | 3.75 <sup>b</sup> |

<sup>a</sup> These parameters for **1c** are estimated from a previously reported crystal structure (A. Asano *et al.*, *Bioorg. Med. Chem.*, 2011, **19**, 3372–3377).

<sup>b</sup> These distance parameters determined as  $D_{\text{lin}}$  correspond to region 2.

<sup>c</sup> This distance parameter determined as  $D_{\text{pln}}$  corresponds to region 1.

**Temperature coefficients of protons of Xaa<sup>1</sup> alkyl side chain in Xc peptides.**

**Table S3.** Temperature dependences of chemical shifts for alkyl protons of Ile<sup>1</sup> side chain of **1c**.

| T (K)                              | $\delta$ Ile <sup>1</sup> $\beta$ H (ppm) | $\delta$ Ile <sup>1</sup> $\gamma^1$ H (ppm) | $\delta$ Ile <sup>1</sup> $\gamma^2$ H (ppm) | $\delta$ Ile <sup>1</sup> $\gamma^3$ H (ppm) | $\delta$ Ile <sup>1</sup> $\delta$ H (ppm) |
|------------------------------------|-------------------------------------------|----------------------------------------------|----------------------------------------------|----------------------------------------------|--------------------------------------------|
| 273                                | ND                                        | 0.963                                        | 0.664                                        | 0.120                                        | 0.346                                      |
| 283                                | ND                                        | 0.960                                        | 0.664                                        | 0.145                                        | 0.355                                      |
| 293                                | ND                                        | 0.972                                        | 0.672                                        | 0.167                                        | 0.365                                      |
| 303                                | 1.457                                     | 0.984                                        | 0.682                                        | 0.189                                        | 0.376                                      |
| 313                                | 1.474                                     | 0.981                                        | 0.692                                        | 0.209                                        | 0.387                                      |
| 323                                | 1.487                                     | 1.009                                        | 0.710                                        | 0.228                                        | 0.399                                      |
| 333                                | 1.508                                     | 1.022                                        | 0.717                                        | 0.246                                        | 0.412                                      |
| $\Delta\delta/\Delta T$<br>(ppb/K) | 1.7                                       | 1.1                                          | 1.0                                          | 2.1                                          | 1.1                                        |

**Table S4.** Temperature dependences of chemical shifts for alkyl protons of Val<sup>1</sup> side chain of **2c**.

| T (K)                              | $\delta$ Val <sup>1</sup> $\beta$ H (ppm) | $\delta$ Val <sup>1</sup> $\gamma^1$ H (ppm) | $\delta$ Val <sup>1</sup> $\gamma^2$ H (ppm) |
|------------------------------------|-------------------------------------------|----------------------------------------------|----------------------------------------------|
| 273                                | 1.747                                     | 0.288                                        | 0.260                                        |
| 283                                | 1.759                                     | 0.301                                        | 0.274                                        |
| 293                                | 1.771                                     | 0.314                                        | 0.287                                        |
| 303                                | 1.782                                     | 0.327                                        | 0.300                                        |
| 313                                | 1.792                                     | 0.338                                        | 0.314                                        |
| 323                                | 1.802                                     | 0.350                                        | 0.329                                        |
| 333                                | 1.812                                     | 0.362                                        | 0.344                                        |
| $\Delta\delta/\Delta T$<br>(ppb/K) | 1.1                                       | 1.2                                          | 1.4                                          |

**Table S5.** Temperature dependences of chemical shifts for alkyl protons of Abu<sup>1</sup> side chain of **3c**.

| T (K)                              | $\delta$ Abu <sup>1</sup> $\beta$ H (ppm) | $\delta$ Abu <sup>1</sup> $\gamma$ H (ppm) |
|------------------------------------|-------------------------------------------|--------------------------------------------|
| 273                                | 1.394                                     | -0.067                                     |
| 283                                | 1.404                                     | -0.047                                     |
| 293                                | 1.413                                     | -0.029                                     |
| 303                                | 1.422                                     | -0.009                                     |
| 313                                | 1.432                                     | 0.010                                      |
| 323                                | 1.440                                     | 0.030                                      |
| 333                                | 1.448                                     | 0.051                                      |
| $\Delta\delta/\Delta T$<br>(ppb/K) | 0.9                                       | 2.0                                        |

**Table S6.** Temperature dependences of chemical shifts for alkyl protons of Ala<sup>1</sup> side chain of **4c**.

| T (K)                              | $\delta$ Ala <sup>1</sup> $\beta$ H (ppm) |
|------------------------------------|-------------------------------------------|
| 273                                | 0.839                                     |
| 283                                | 0.848                                     |
| 293                                | 0.855                                     |
| 303                                | 0.862                                     |
| 313                                | 0.869                                     |
| 323                                | 0.877                                     |
| 333                                | 0.886                                     |
| $\Delta\delta/\Delta T$<br>(ppb/K) | 0.8                                       |

## Thermodynamic parameters and van't Hoff plots for peptides Xb and Xc (X=2-4).

**Table S7.** Equilibrium parameters of peptide **2b**.

| $T$ (K) | Thz H (ppm) | $K^*$ | $\Delta G^0$ ( $\text{J}\cdot\text{mol}^{-1}$ )** |
|---------|-------------|-------|---------------------------------------------------|
| 273     | 7.67        | 1.284 | -567                                              |
| 283     | 7.70        | 1.090 | -204                                              |
| 293     | 7.74        | 0.902 | 250                                               |
| 303     | 7.77        | 0.764 | 678                                               |
| 313     | 7.80        | 0.652 | 1114                                              |
| 323     | 7.82        | 0.560 | 1559                                              |
| 333     | 7.85        | 0.484 | 2006                                              |

\*Equilibrium constants were calculated from the average value of the chemical shifts of Thz<sup>4</sup> and Thz<sup>8</sup> protons:  $K = (\delta_s - \delta_{\text{obs}}) / (\delta_{\text{obs}} - \delta_f)$ .  $\delta_s$  (8.09 ppm) is the chemical shift for Thz proton of T3ASC.  $\delta_f$  (7.35 ppm) is the chemical shift for Thz proton of *d*ASC at 273 K.

\*\* $\Delta G^0 = -RT \ln K$

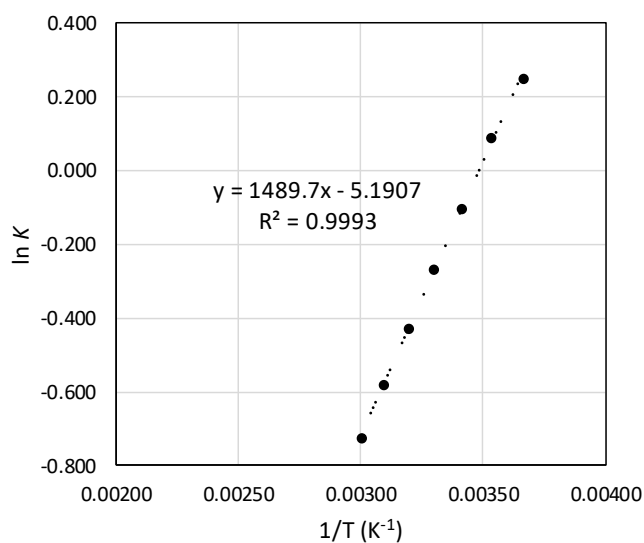

**Fig. S20** van't Hoff plot of peptide **2b**.

**Table S8.** Thermodynamic parameters of peptide **2b**.

| $\Delta H^0$ ( $\text{kJ}\cdot\text{mol}^{-1}$ ) | $\Delta S^0$ ( $\text{J}\cdot\text{mol}^{-1}$ ) | $\Delta G^0_{298\text{K}}$ ( $\text{kJ}\cdot\text{mol}^{-1}$ )* |
|--------------------------------------------------|-------------------------------------------------|-----------------------------------------------------------------|
| -12.39                                           | -43.16                                          | 0.47                                                            |

\* $\Delta G^0 = \Delta H^0 - T\Delta S^0$

**Table S9.** Equilibrium parameters of peptide **3b**.

| $T$ (K) | Thz H (ppm) | $K^*$ | $\Delta G^0$ ( $\text{J}\cdot\text{mol}^{-1}$ )** |
|---------|-------------|-------|---------------------------------------------------|
| 273     | 7.64        | 1.561 | -1010                                             |
| 283     | 7.67        | 1.316 | -646                                              |
| 293     | 7.70        | 1.123 | -283                                              |
| 303     | 7.73        | 0.960 | 102                                               |
| 313     | 7.76        | 0.820 | 515                                               |
| 323     | 7.78        | 0.707 | 931                                               |
| 333     | 7.81        | 0.612 | 1359                                              |

\*Equilibrium constants were calculated from the average value of the chemical shifts of Thz<sup>4</sup> and Thz<sup>8</sup> protons:  $K = (\delta_s - \delta_{\text{obs}}) / (\delta_{\text{obs}} - \delta_f)$ .  $\delta_s$  (8.09 ppm) is the chemical shift for Thz proton of T3ASC.  $\delta_f$  (7.35 ppm) is the chemical shift for Thz proton of *d*ASC at 273 K.

\*\* $\Delta G^0 = -RT \ln K$

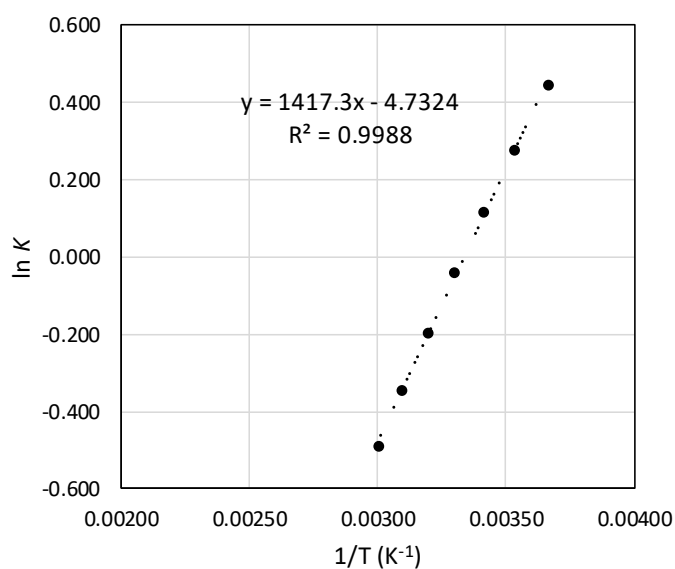**Fig. S21** van't Hoff plot of peptide **3b**.**Table S10.** Thermodynamic parameters of peptide **3b**.

| $\Delta H^0$ ( $\text{kJ}\cdot\text{mol}^{-1}$ ) | $\Delta S^0$ ( $\text{J}\cdot\text{mol}^{-1}$ ) | $\Delta G^0_{298\text{K}}$ ( $\text{kJ}\cdot\text{mol}^{-1}$ )* |
|--------------------------------------------------|-------------------------------------------------|-----------------------------------------------------------------|
| -11.78                                           | -39.35                                          | -0.06                                                           |

\* $\Delta G^0 = \Delta H^0 - T\Delta S^0$



**Table S11.** Equilibrium parameters of peptide **4b**.

| $T$ (K) | Thz <sup>4or8</sup> H (ppm) | $K^*$ | $\Delta G^0$ (J·mol <sup>-1</sup> )** |
|---------|-----------------------------|-------|---------------------------------------|
| 273     | 7.55                        | 2.795 | -2333                                 |
| 283     | 7.58                        | 2.217 | -1874                                 |
| 293     | 7.62                        | 1.782 | -1407                                 |
| 298     | 7.63                        | 1.624 | -1202                                 |
| 303     | 7.65                        | 1.442 | -923                                  |
| 313     | 7.69                        | 1.173 | -416                                  |
| 323     | 7.73                        | 0.968 | 87                                    |
| 333     | 7.76                        | 0.805 | 601                                   |

\*Equilibrium constants were calculated from the average value of the chemical shifts of Thz<sup>4</sup> and Thz<sup>8</sup> protons:  $K = (\delta_s - \delta_{\text{obs}}) / (\delta_{\text{obs}} - \delta_f)$ .  $\delta_s$  (8.09 ppm) is the chemical shift for Thz proton of T3ASC.  $\delta_f$  (7.35 ppm) is the chemical shift for Thz proton of *d*ASC at 273 K.

\*\* $\Delta G^0 = -RT \ln K$

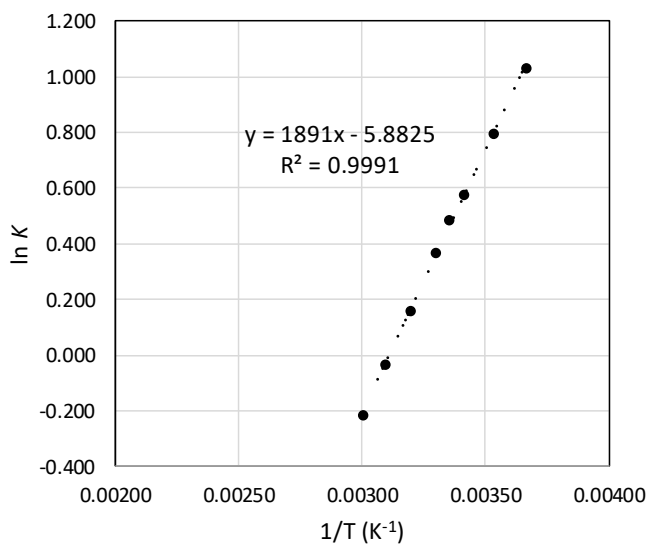**Fig. S22** van't Hoff plot of peptide **4b**.**Table S12.** Thermodynamic parameters of peptide **4b**.

| $\Delta H^0$ (kJ·mol <sup>-1</sup> ) | $\Delta S^0$ (J·mol <sup>-1</sup> ) | $\Delta G^0_{298K}$ (kJ·mol <sup>-1</sup> )* |
|--------------------------------------|-------------------------------------|----------------------------------------------|
| -15.72                               | -48.91                              | -1.15                                        |

\* $\Delta G^0 = \Delta H^0 - T\Delta S^0$

**Table S13.** Equilibrium parameters of peptide **2c**.

| $T$ (K) | Thz H (ppm) | $K^*$ | $\Delta G^0$ ( $\text{J}\cdot\text{mol}^{-1}$ )** |
|---------|-------------|-------|---------------------------------------------------|
| 273     | 8.00        | 0.137 | 4516                                              |
| 283     | 8.01        | 0.128 | 4836                                              |
| 293     | 8.01        | 0.120 | 5175                                              |
| 303     | 8.02        | 0.111 | 5535                                              |
| 313     | 8.02        | 0.104 | 5899                                              |
| 323     | 8.03        | 0.096 | 6285                                              |
| 333     | 8.03        | 0.089 | 6696                                              |

\*Equilibrium constants were calculated from the average value of the chemical shifts of Thz<sup>4</sup> and Thz<sup>8</sup> protons:  $K = (\delta_s - \delta_{\text{obs}}) / (\delta_{\text{obs}} - \delta_f)$ .  $\delta_s$  (8.09 ppm) is the chemical shift for Thz proton of T3ASC.  $\delta_f$  (7.35 ppm) is the chemical shift for Thz proton of *d*ASC at 273 K.

\*\* $\Delta G^0 = -RT \ln K$

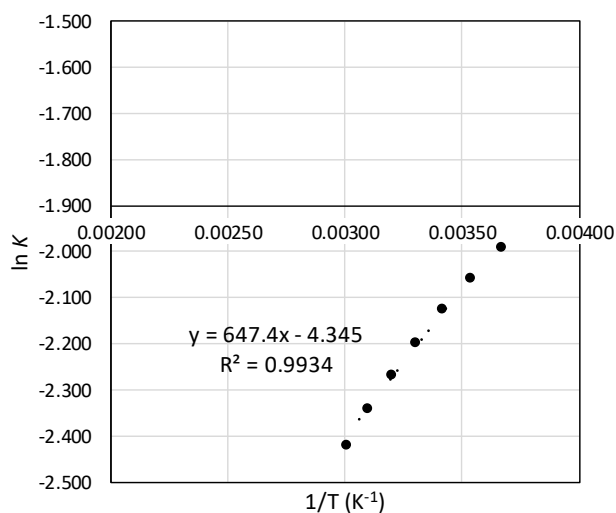**Fig. S23** van't Hoff plot of peptide **2c**.**Table S14.** Thermodynamic parameters of peptide **2c**.

| $\Delta H^0$ ( $\text{kJ}\cdot\text{mol}^{-1}$ ) | $\Delta S^0$ ( $\text{J}\cdot\text{mol}^{-1}$ ) | $\Delta G^0_{298\text{K}}$ ( $\text{kJ}\cdot\text{mol}^{-1}$ )* |
|--------------------------------------------------|-------------------------------------------------|-----------------------------------------------------------------|
| -5.38                                            | -36.12                                          | 5.38                                                            |

\* $\Delta G^0 = \Delta H^0 - T\Delta S^0$

**Table S15.** Equilibrium parameters of peptide **3c**.

| $T$ (K) | Thz H (ppm) | $K^*$ | $\Delta G^0$ ( $\text{J}\cdot\text{mol}^{-1}$ )** |
|---------|-------------|-------|---------------------------------------------------|
| 273     | 7.97        | 0.189 | 3784                                              |
| 283     | 7.98        | 0.177 | 4069                                              |
| 293     | 7.99        | 0.165 | 4384                                              |
| 303     | 7.99        | 0.154 | 4720                                              |
| 313     | 8.00        | 0.141 | 5096                                              |
| 323     | 8.01        | 0.130 | 5484                                              |
| 333     | 8.01        | 0.120 | 5881                                              |

\*Equilibrium constants were calculated from the average value of the chemical shifts of Thz<sup>4</sup> and Thz<sup>8</sup> protons:  $K = (\delta_s - \delta_{\text{obs}}) / (\delta_{\text{obs}} - \delta_f)$ .  $\delta_s$  (8.09 ppm) is the chemical shift for Thz proton of T3ASC.  $\delta_f$  (7.35 ppm) is the chemical shift for Thz proton of *d*ASC at 273 K.

\*\* $\Delta G^0 = -RT \ln K$

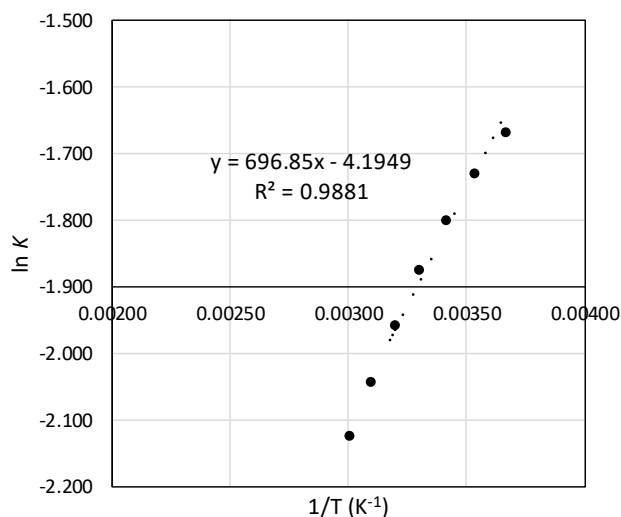**Fig. S24** van't Hoff plot of peptide **3c**.**Table S16.** Thermodynamic parameters of peptide **3c**.

| $\Delta H^0$ ( $\text{kJ}\cdot\text{mol}^{-1}$ ) | $\Delta S^0$ ( $\text{J}\cdot\text{mol}^{-1}$ ) | $\Delta G^0_{298\text{K}}$ ( $\text{kJ}\cdot\text{mol}^{-1}$ )* |
|--------------------------------------------------|-------------------------------------------------|-----------------------------------------------------------------|
| -5.79                                            | -34.88                                          | 4.60                                                            |

\* $\Delta G^0 = \Delta H^0 - T\Delta S^0$

**Table S17.** Equilibrium parameters of peptide **4c**.

| $T$ (K) | Thz <sup>4or8</sup> H (ppm) | $K^*$ | $\Delta G^0$ (J·mol <sup>-1</sup> )** |
|---------|-----------------------------|-------|---------------------------------------|
| 273     | 7.91                        | 0.317 | 2610                                  |
| 283     | 7.93                        | 0.278 | 3011                                  |
| 293     | 7.95                        | 0.244 | 3439                                  |
| 298     | 7.95                        | 0.232 | 3617                                  |
| 303     | 7.96                        | 0.212 | 3906                                  |
| 313     | 7.98                        | 0.184 | 4405                                  |
| 323     | 7.99                        | 0.158 | 4954                                  |
| 333     | 8.00                        | 0.138 | 5491                                  |

\*Equilibrium constants were calculated from the average value of the chemical shifts of Thz<sup>4</sup> and Thz<sup>8</sup> protons:  $K = (\delta_s - \delta_{obs}) / (\delta_{obs} - \delta_f)$ .  $\delta_s$  (8.09 ppm) is the chemical shift for Thz proton of T3ASC.  $\delta_f$  (7.35 ppm) is the chemical shift for Thz proton of *d*ASC at 273 K.

\*\* $\Delta G^0 = -RT \ln K$

**Fig. S25** van't Hoff plot of peptide **4c**.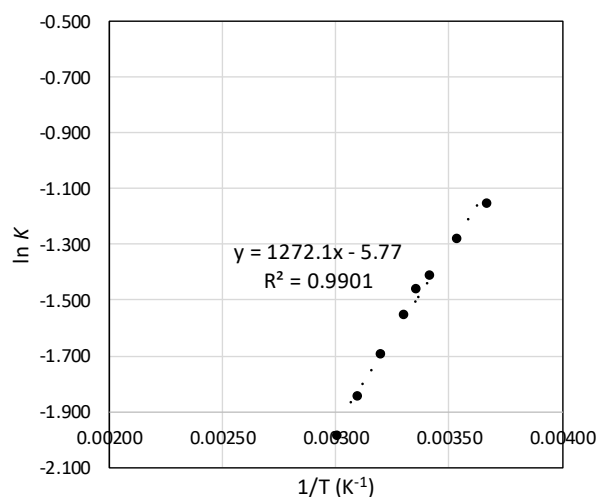**Table S18.** Thermodynamic parameters of peptide **4c**.

| $\Delta H^0$ (kJ·mol <sup>-1</sup> ) | $\Delta S^0$ (J·mol <sup>-1</sup> ) | $\Delta G^0_{298K}$ (kJ·mol <sup>-1</sup> )* |
|--------------------------------------|-------------------------------------|----------------------------------------------|
| -10.58                               | -47.97                              | 3.72                                         |

\* $\Delta G^0 = \Delta H^0 - T\Delta S^0$

## Cytotoxicities of peptides toward HL-60 cell.

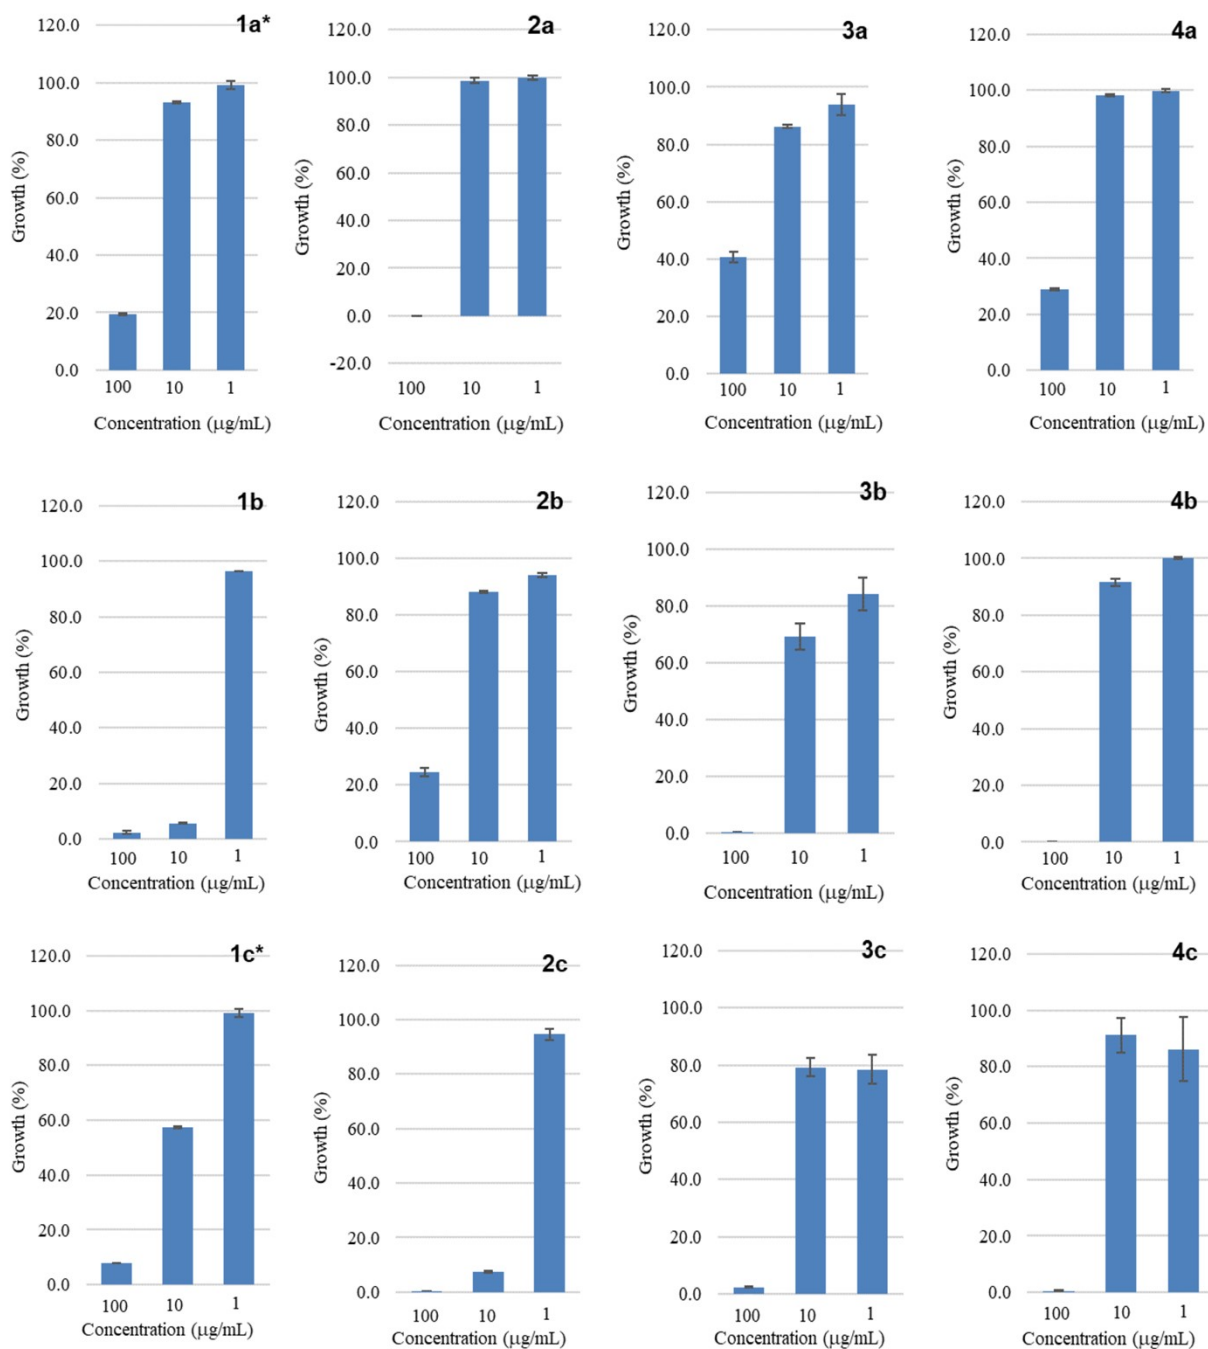

**Fig. S26** Bar graph representation of cell growth data with different peptide concentration.

\*These data are taken from a previous report (A. Asano *et al.*, *Bioorg. Med. Chem.*, 2011,**19**, 3372–3377).

**Chemical structures of *d*ASC and T3ASC as reference peptides.**

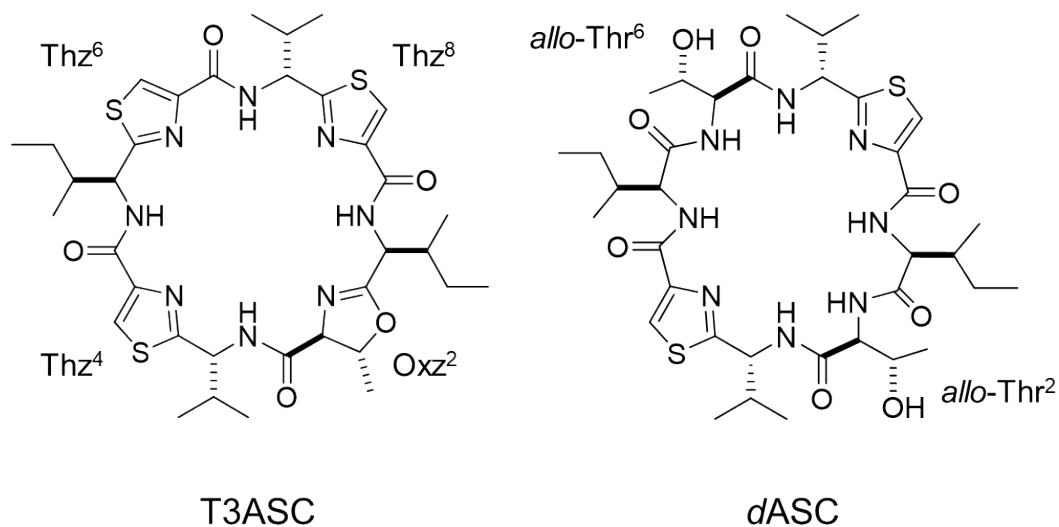

**Fig. S27** Chemical structures of T3ASC (A. Asano *et al.*, *J. Pept. Sci.*, 2018, e3120) and *d*ASC (A. Asano *et al.*, *Biopolymers*, 2001, **58**, 295–304). T3ASC and *d*ASC were used as reference peptides to provide reference chemical shifts for the fully square and folded forms, respectively.
